# Supplementary material for: Au(I)/Au(III)-catalyzed Sonogashira-type reactions of functionalized terminal alkynes with arylboronic acids under mild conditions
Source: PubMed Central journal article supplement (PMC3135097; doi:10.3762/bjoc.7.92), 2011-06-15

# Supporting Information

for

## **Au(I)/Au(III)-catalyzed Sonogashira-type reactions of functionalized terminal alkynes with arylboronic acids under mild conditions**

Deyun Qian<sup>1</sup> and Junliang Zhang <sup>\*1,2</sup>

Address: <sup>1</sup>Shanghai Key Laboratory of Green Chemistry and Chemical Processes, Department of Chemistry, East China Normal University, 3663 N, Zhongshan Road, Shanghai 200062 (P. R. China) and <sup>2</sup>State Key Laboratory of Organometallic Chemistry, Shanghai Institute of Organic Chemistry, Chinese Academy of Sciences, Ling Ling Road 345 Shanghai 200032 (P. R. China)

E-mail: Deyun Qian - 51100606057@ecnu.cn; Junliang Zhang - jlzhang@chem.ecnu.edu.cn

\* Corresponding author

## **Experimental details and spectra of new compounds**

| Content                                                       | Page number |
|---------------------------------------------------------------|-------------|
| <b><u>1. General information</u></b>                          | <b>S2</b>   |
| <b><u>2. General procedure for conditions screening</u></b>   | <b>S3</b>   |
| <b><u>3. General procedure</u></b>                            | <b>S6</b>   |
| <b><u>4. References</u></b>                                   | <b>S12</b>  |
| <b><u>5. <sup>1</sup>H and <sup>13</sup>C NMR spectra</u></b> | <b>S13</b>  |

## **1. General information**

Unless otherwise noted, commercial materials were directly used without further purification. Anhydrous acetonitrile (MeCN) and triethylamine (NEt<sub>3</sub>) were distilled from CaH<sub>2</sub> under a nitrogen atmosphere prior to use. Reactions were monitored by thin layer chromatography (TLC) using Whatman<sup>®</sup> pre-coated silica gel plates. Flash column chromatography was performed on SiliCycle<sup>®</sup> silica gel (230–400 mesh). <sup>1</sup>H NMR and <sup>13</sup>C NMR spectra were recorded with a Bruker 400 MHz spectrometer and chemical shifts are reported in ppm, relative to CHCl<sub>3</sub> (7.26 ppm for <sup>1</sup>H, and 77.00 ppm for <sup>13</sup>C) unless otherwise noted. Splitting patterns of an apparent multiplet associated with an averaged coupling constant were designed as s (singlet), d (doublet), t (triplet), q (quartet), and m (multiplet).

## 2. General procedure for conditions screening

Propargyl tosylamide **1a** (83.7 mg, 0.4 mmol) was dissolved in MeCN (2 mL) and PhB(OH)<sub>2</sub> (97.5 mg, 0.8 mmol), the gold catalyst (5 mol % or 2.5 mol %) and base (1.05 equiv) added followed by Selectfluor<sup>®</sup> (283.4 mg, 0.8 mmol). The reaction mixture was stirred at room temperature for 10–24 h and the reaction was monitored by TLC. After completion, the reaction mixture was diluted with EtOAc and filtered through a pad of celite. The filtrate was concentrated under reduced pressure and the crude product purified by chromatography on silica gel (using hexanes/EtOAc as eluent).

**Table S1:**

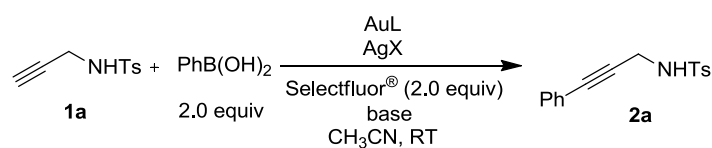

| entry          | AuL (mol %)               | AgX (mol %)           | base (equiv)             | t (h) | Yield (%) |
|----------------|---------------------------|-----------------------|--------------------------|-------|-----------|
| 1              | Ph <sub>3</sub> PAuCl (5) | -                     | Et <sub>3</sub> N (1.05) | 22    | trace     |
| 2              | Ph <sub>3</sub> PAuCl (5) | AgOTf (5)             | Et <sub>3</sub> N (1.05) | 18    | 56        |
| 3              | AuCl (5)                  | AgOTf (5)             | Et <sub>3</sub> N (1.05) | 24    | 21        |
| 4              | -                         | AgOTf (5)             | Et <sub>3</sub> N (1.05) | 24    | 0         |
| 5 <sup>b</sup> | Ph <sub>3</sub> PAuCl (5) | AgOTf (5)             | Et <sub>3</sub> N (1.05) | 22    | 0         |
| 6 <sup>c</sup> | Ph <sub>3</sub> PAuCl (5) | AgOTf (5)             | Et <sub>3</sub> N (1.05) | 22    | 41        |
| 7              | Ph <sub>3</sub> PAuCl (5) | AgBF <sub>4</sub> (5) | Et <sub>3</sub> N (1.05) | 10    | 65        |

|    |                               |                        |                                                                                     |    |                       |
|----|-------------------------------|------------------------|-------------------------------------------------------------------------------------|----|-----------------------|
| 8  | Ph <sub>3</sub> PAuCl (5)     | AgSbF <sub>4</sub> (5) | Et <sub>3</sub> N (1.05)                                                            | 10 | 62                    |
| 9  | Ph <sub>3</sub> PAuCl (5)     | AgNO <sub>3</sub> (5)  | Et <sub>3</sub> N (1.05)                                                            | 10 | 45 <sup>a</sup>       |
| 10 | Ph <sub>3</sub> PAuCl (5)     | AgPF <sub>6</sub> (5)  | Et <sub>3</sub> N (1.05)                                                            | 10 | 40 <sup>a</sup>       |
| 11 | Ph <sub>3</sub> PAuCl (5)     | AgOAc(5)               | Et <sub>3</sub> N (1.05)                                                            | 10 | 0                     |
| 12 | Ph <sub>3</sub> PAuCl (5)     | AgBF <sub>4</sub> (5)  | Et <sub>3</sub> N (1.2)                                                             | 10 | 69 <sup>a</sup>       |
| 13 | dppf(AuCl) <sub>2</sub> (2.5) | AgOTf (5)              | Et <sub>3</sub> N (1.05)                                                            | 14 | 39 <sup>a</sup>       |
| 14 | dppp(AuCl) <sub>2</sub> (2.5) | AgOTf (5)              | Et <sub>3</sub> N (1.05)                                                            | 14 | 56 (65 <sup>a</sup> ) |
| 15 | dppp(AuCl) <sub>2</sub> (2.5) | AgBF <sub>4</sub> (5)  | Et <sub>3</sub> N (1.05)                                                            | 14 | 0                     |
| 16 | dppe(AuCl) <sub>2</sub> (2.5) | AgOTf (5)              | Et <sub>3</sub> N (1.05)                                                            | 14 | 48 <sup>a</sup>       |
| 17 | dppb(AuCl) <sub>2</sub> (2.5) | AgOTf (5)              | Et <sub>3</sub> N (1.05)                                                            | 14 | 65 <sup>a</sup>       |
| 18 | dppp(AuCl) <sub>2</sub> (5)   | AgOTf (5)              | Et <sub>3</sub> N (1.05)                                                            | 16 | 59 <sup>a</sup>       |
| 19 | dppp(AuCl) <sub>2</sub> (5)   | AgOTf (5)              | K <sub>3</sub> PO <sub>4</sub> ·3H <sub>2</sub> O (1.5)                             | 22 | 59                    |
| 20 | dppp(AuCl) <sub>2</sub> (5)   | AgOTf (5)              | K <sub>3</sub> PO <sub>4</sub> ·3H <sub>2</sub> O (1.5)+<br>Et <sub>3</sub> N (0.5) | 22 | 47                    |
| 21 | dppp(AuCl) <sub>2</sub> (5)   | AgOTf (5)              | K <sub>2</sub> CO <sub>3</sub> (1.5)                                                | 22 | 34                    |
| 22 | Ph <sub>3</sub> PAuCl (5)     | AgOTf (5)              | Et <sub>3</sub> N (1.5)                                                             | 22 | 53                    |
| 23 | Ph <sub>3</sub> PAuCl (5)     | AgOTf (5)              | iPr <sub>2</sub> NH (1.05)                                                          | 12 | trace                 |
| 24 | Ph <sub>3</sub> PAuCl (5)     | AgOTf (5)              | Bu <sub>3</sub> N (1.05)                                                            | 12 | trace                 |
| 25 | Ph <sub>3</sub> PAuCl (5)     | AgOTf (5)              | TMEDA (1.05)                                                                        | 12 | trace                 |
| 26 | Ph <sub>3</sub> PAuCl (5)     | AgOTf (5)              | PhNMe <sub>2</sub> (1.05)                                                           | 12 | ND                    |

<sup>a</sup>Yield determined by <sup>1</sup>H NMR. <sup>b</sup>Selectfluor<sup>®</sup> (0 equiv). <sup>c</sup>PhB(OH)<sub>2</sub> (1.5 equiv).

**Table S2:**

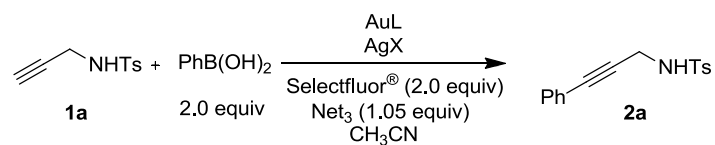

| entry                | <b>1a</b><br>(mmol) | <b>AuL (mol %)</b>            | <b>AgX</b><br>(mol %) | <b>T (°C)</b> | <b>t (h)</b> | <b>product</b><br>(yield %) |
|----------------------|---------------------|-------------------------------|-----------------------|---------------|--------------|-----------------------------|
| <b>1</b>             | 0.4                 | (XPhos)AuCl (5)               | AgOTf (5)             | RT            | 24           | trace                       |
| <b>2<sup>a</sup></b> | 0.4                 | (XPhos)AuCl (5)               | AgOTf (5)             | RT            | 24           | trace                       |
| <b>3</b>             | 0.4                 | $\text{Ph}_3\text{PAuCl}$ (5) | $\text{AgBF}_4$ (5)   | 55            | 3.5          | 63                          |
| <b>4<sup>b</sup></b> | 0.48                | $\text{Ph}_3\text{PAuCl}$ (5) | $\text{AgBF}_4$ (5)   | RT            | 24           | trace                       |
| <b>5<sup>c</sup></b> | 0.4                 | $\text{Ph}_3\text{PAuCl}$ (5) | $\text{AgBF}_4$ (5)   | RT            | 24           | trace                       |
| <b>6<sup>d</sup></b> | 0.48                | $\text{Ph}_3\text{PAuCl}$ (5) | AgOTf (5)             | RT            | 24           | ND                          |
| <b>7</b>             | 0.4                 | $\text{Ph}_3\text{PAuCl}$ (5) | AgOTf (5)             | 40            | 24           | 46                          |

<sup>a</sup>base:  $\text{K}_3\text{PO}_4 \cdot 3\text{H}_2\text{O}$  (1.5 equiv). <sup>b</sup>S:  $\text{PhB(OH)}_2 = 1.2: 1$ . <sup>c</sup>**1a**:  $\text{PhB(OH)}_2 = 1.5: 1$ . <sup>d</sup>**1a**:  $\text{PhB(OH)}_2 = 1.5: 1$ .

**Table S3<sup>a</sup>:**

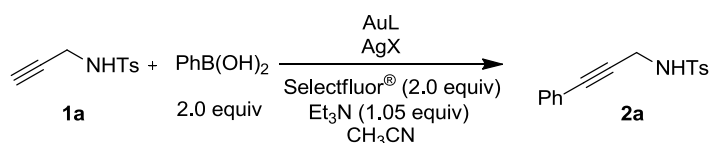

| entry    | <b>1a</b><br>(mmol) | <b>AuL (mol %)</b>            | <b>AgX</b><br>(mol %) | <b>T (°C)</b> | <b>t (h)</b> | <b>product</b><br>(yield %) |
|----------|---------------------|-------------------------------|-----------------------|---------------|--------------|-----------------------------|
| <b>1</b> | 0.4                 | $\text{Ph}_3\text{PAuCl}$ (5) | AgOTf (5)             | 50            | 12           | 72 (73 <sup>b</sup> )       |
| <b>2</b> | 0.4                 | $\text{Ph}_3\text{PAuCl}$ (5) | AgOTf (5)             | rt            | 12           | 59 <sup>b</sup>             |
| <b>3</b> | 0.2                 | $\text{Ph}_3\text{PAuCl}$ (5) | $\text{AgBF}_4$ (5)   | rt            | 12           | 80 <sup>b</sup>             |

|   |     |                             |                       |    |    |                      |
|---|-----|-----------------------------|-----------------------|----|----|----------------------|
| 4 | 0.2 | Ph <sub>3</sub> PAuCl (5)   | AgPF <sub>6</sub> (5) | rt | 16 | 40 <sup>b</sup>      |
| 5 | 0.2 | Ph <sub>3</sub> PAuCl (5)   | AgOAc (5)             | rt | 16 | 0                    |
| 6 | 0.4 | Ph <sub>3</sub> PAuCl (5)   | AgBF <sub>4</sub> (5) | rt | 12 | 75(80 <sup>b</sup> ) |
| 7 | 0.4 | Ph <sub>3</sub> PAuCl (5)   | AgOTf (5)             | rt | 16 | 70 <sup>b</sup>      |
| 8 | 0.2 | dppm(AuCl) <sub>2</sub> (5) | AgOTf (5)             | rt | 16 | 83 <sup>b</sup>      |
| 9 | 0.4 | dppm(AuBr) <sub>2</sub> (5) | -                     | rt | 16 | trace                |

<sup>a</sup>The reaction was carried out under an atmosphere of nitrogen (N<sub>2</sub>). <sup>b</sup>Yield determined by <sup>1</sup>H NMR.

### 3. General procedure

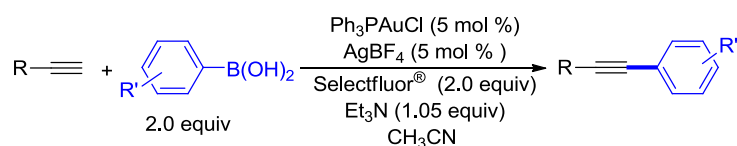

All reactions were carried out under an atmosphere of nitrogen (N<sub>2</sub>).

The alkyne (83.7 mg, 0.4 mmol) was dissolved in MeCN (2 mL), PhB(OH)<sub>2</sub> (97.5 mg, 0.8 mmol), Ph<sub>3</sub>PAuCl (5 mol %), AgBF<sub>4</sub> (5 mol %) and Et<sub>3</sub>N (1.05 equiv) were added followed by Selectfluor<sup>®</sup> (283.4 mg, 0.8 mmol). The reaction mixture was stirred at the noted temperature for 12–45 h and the reaction monitored by TLC. After completion, the reaction mixture was diluted with EtOAc and filtered through a pad of celite. The filtrate was concentrated under reduced pressure and the crude product was purified by chromatography on silica gel (using hexanes/EtOAc as eluents).

**(1) *N*-(3-Phenylprop-2-ynyl)-*p*-toluenesulfonamide (2a)**

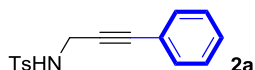

The reaction of propargyl tosylamide **1a** and phenylboronic acid was carried out at room temperature for 12 h to afford compound **2a** (hexanes/EtOAc = 3/1) in 75% yield as a pale orange solid. Its spectroscopic data were in accord with those reported in the literature [1]. <sup>1</sup>H NMR (400 MHz, CDCl<sub>3</sub>) δ 7.81 (d, *J* = 8.0 Hz, 2H), 7.30–7.22 (m, 5H), 7.11 (d, *J* = 8.0 Hz, 2H), 4.88 (t, *J* = 5.6 Hz, 1H), 4.06 (d, *J* = 6.4 Hz, 2H), 2.34 (s, 3H); <sup>13</sup>C NMR (100 MHz, CDCl<sub>3</sub>) δ 143.7, 136.8, 131.5, 129.7, 128.4, 128.1, 127.5, 122.0, 84.7, 83.2, 33.7, 21.4.

**(2) 4-Methyl-*N*-(3-*p*-tolylprop-2-ynyl)benzenesulfonamide (2b)**

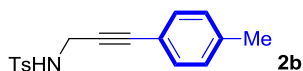

The reaction of propargyl tosylamide **1b** and phenylboronic acid was carried out at room temperature for 18 h to afford compound **2b** (hexanes/EtOAc = 5/1) in 70% yield as a white solid. Its spectroscopic data were in accord with those reported in the literature [2]. <sup>1</sup>H NMR (400 MHz, CDCl<sub>3</sub>) δ 7.80 (d, *J* = 7.6 Hz, 2H), δ 7.26 (d, *J* = 8.0 Hz, 2H), 7.05–7.00 (m, 4H), 4.88 (t, *J* = 6.0 Hz, 1H), 4.06 (d, *J* = 6.0 Hz, 2H), 2.36 (s, 3H), 2.32 (s, 3H); <sup>13</sup>C NMR (100 MHz, CDCl<sub>3</sub>) δ 143.7, 138.6, 136.8, 131.4, 129.6, 128.9, 127.4, 118.9, 84.8, 82.5, 33.8, 21.42, 21.40. EI-MS (*m/z*, relative intensity): 299 (M<sup>+</sup>, 2.99), 91 (100). HRMS (EI) calcd. for [C<sub>17</sub>H<sub>17</sub>NO<sub>2</sub>S]<sup>+</sup>: 299.0980, found 299.0984.

### (3) *N*-[3-(4-Chlorophenyl)-prop-2-ynyl]-*p*-toluenesulfonamide (**2c**)

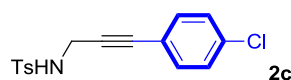

The reaction of propargyl tosylamide **1c** and 4-chlorophenylboronic acid was carried out at 50 °C for 12 h to afford **2c** (hexanes/EtOAc = 5/1) in 89% yield as a white solid. Its spectroscopic data were in accord with those reported in the literature [3].  $^1\text{H}$  NMR (400 MHz,  $\text{CDCl}_3$ )  $\delta$  7.80 (d,  $J$  = 8.0 Hz, 2H), 7.26 (d,  $J$  = 7.6 Hz, 2H), 7.21 (d,  $J$  = 7.6 Hz, 2H), 7.04 (d,  $J$  = 8.0 Hz, 2H), 4.85 (t,  $J$  = 6.0 Hz, 1H), 4.06 (d,  $J$  = 6.0 Hz, 2H), 2.36 (s, 3H);  $^{13}\text{C}$  NMR (100 MHz,  $\text{CDCl}_3$ )  $\delta$  143.8, 136.8, 134.6, 132.7, 129.7, 128.5, 127.5, 120.5, 84.2, 83.6, 33.7, 21.5. EI-MS ( $m/z$ , relative intensity): 319 ( $\text{M}^+$ , 1.89), 164 (100). HRMS (EI) calcd. for  $[\text{C}_{16}\text{H}_{14}\text{NO}_2\text{SCl}]^+$ : 319.0434, found 319.0441.

### (4) *N*-[3-(4-Fluorophenyl)-prop-2-ynyl]-*p*-toluenesulfonamide (**2d**)

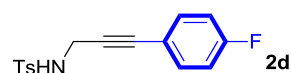

The reaction of propargyl tosylamide **1d** and phenylboronic acid was carried out at 50 °C for 12 h to afford **2d** (hexanes/EtOAc = 5/1) in 58% yield as a white solid.  $^1\text{H}$  NMR (400 MHz,  $\text{CDCl}_3$ )  $\delta$  7.80 (d,  $J$  = 7.6 Hz, 2H), 7.27 (d,  $J$  = 8.4 Hz, 2H), 7.13–7.10 (m, 2H), 7.00–6.92 (m, 2H), 4.82 (s, 1H), 4.07 (d,  $J$  = 6.0 Hz, 2H), 2.36 (s, 3H);  $^{13}\text{C}$  NMR (100 MHz,  $\text{CDCl}_3$ )  $\delta$  162.5 (d,  $^1J_{\text{C}, \text{F}}$  = 248 Hz), 143.7, 136.8, 133.5, 133.4, 129.6, 127.5, 118.1, 115.4 (d,  $^2J_{\text{C}, \text{F}}$  = 22 Hz), 83.6, 83.0, 33.6, 21.4.  $^{19}\text{F}$  NMR (376 MHz,  $\text{CDCl}_3$ )  $\delta$  110.33. EI-MS ( $m/z$ , relative intensity): 303 ( $\text{M}^+$ , 0.78), 148 (100). HRMS (EI) calcd. for



[C<sub>16</sub>H<sub>14</sub>NO<sub>2</sub>SF]<sup>+</sup>: 303.0729, found 303.0732.

**(5) Methyl 4-[3-(4-methylphenylsulfonamido)prop-1-ynyl]benzoate (2e)**

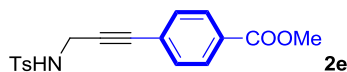

The reaction of propargyl tosylamide **1e** and 4-(methoxycarbonyl)-phenylboronic acid was carried out at 50 °C for 12 h to afford **2e** (hexanes/EtOAc = 5/1) in 66% yield as a white solid. <sup>1</sup>H NMR (400 MHz, CDCl<sub>3</sub>) δ 7.90 (d, *J* = 7.6 Hz, 2H), 7.81 (d, *J* = 7.2 Hz, 2H), 7.27 (d, *J* = 7.6 Hz, 2H), 7.16 (d, *J* = 7.6 Hz, 2H), 4.87 (t, *J* = 5.6 Hz, 1H), 4.10 (d, *J* = 5.6 Hz, 2H), 3.92 (s, 3 H), 2.36 (s, 3 H); <sup>13</sup>C NMR (100 MHz, CDCl<sub>3</sub>) δ 166.4, 143.7, 136.8, 131.4, 129.6, 129.2, 127.5, 126.7, 86.3, 83.8, 52.3, 33.6, 21.4. EI-MS (*m/z*, relative intensity): 343 (M<sup>+</sup>, 1), 188 (100). HRMS (EI) calcd. for [C<sub>18</sub>H<sub>17</sub>NO<sub>4</sub>S]<sup>+</sup>: 343.0878, found 343.0879.

**(6) *N*-[3-(4-Methoxyphenyl)-prop-2-ynyl]-*p*-toluenesulfonamide (2f)**

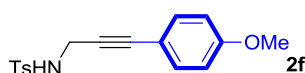

The product could not be separated from the unreacted starting material.

Based on the <sup>1</sup>H NMR of the mixture, **2f** was produced in 31% yield.

**(7) *tert*-Butyl 4-phenylbut-3-ynyl(tosyl)carbamate (3)**

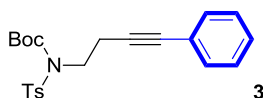

The reaction was carried out at 50 °C for 12 h to give **3** (hexanes/EtOAc = 5/1) in 48% yield as a viscous oil. <sup>1</sup>H NMR (400 MHz, CDCl<sub>3</sub>) δ 7.83 (d, *J* = 7.6 Hz,

2H), 7.37 (s, 2H), 7.27 (s, 5H), 4.09 (t,  $J = 7.2$  Hz, 1H), 2.88 (t,  $J = 7.2$  Hz, 2H), 2.42 (s, 3H), 1.34 (s, 9 H);  $^{13}\text{C}$  NMR (100 MHz,  $\text{CDCl}_3$ )  $\delta$  150.8, 144.2, 137.2, 131.6, 129.2, 128.1, 127.9, 127.8, 123.4, 86.0, 84.5, 82.5, 45.3, 27.8, 21.5, 20.8. EI-MS ( $m/z$ , relative intensity): 399 ( $\text{M}^+$ , 0.46), 128 (100). HRMS (EI) calcd. for  $[\text{C}_{22}\text{H}_{25}\text{NO}_4\text{S}]^+$ : 399.1504, found 399.1471.

**(8) *tert*-Butyl 5-phenylpent-4-ynyl(tosyl)carbamate (4)**

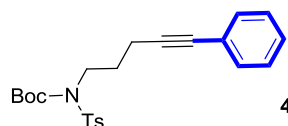

The reaction was run at 50 °C for 12 h to give **4** (hexanes/EtOAc = 5/1) in 68% yield as a viscous oil.  $^1\text{H}$  NMR (400 MHz,  $\text{CDCl}_3$ )  $\delta$  7.81 (d,  $J = 7.6$  Hz, 2H), 7.41–7.40 (m, 2H), 7.31–7.27 (m, 5H), 3.98 (t,  $J = 7.2$  Hz, 1H), 2.50 (t,  $J = 6.8$  Hz, 2H), 2.43 (s, 3H), 2.07 (t,  $J = 6.8$  Hz, 1H), 1.34 (s, 9H);  $^{13}\text{C}$  NMR (100 MHz,  $\text{CDCl}_3$ )  $\delta$  150.9, 144.1, 137.3, 131.6, 129.2, 128.1, 127.8, 127.6, 123.7, 88.7, 84.2, 81.2, 46.4, 29.2, 27.8, 21.6, 17.0. EI-MS ( $m/z$ , relative intensity): 313 ( $\text{M}^+ - 100$ , 0.19), 57 (100). HRMS (EI) calcd. for  $[\text{C}_{18}\text{H}_{19}\text{NO}_2\text{S}]^+$ : 313.1137, found 313.1139.

**(9) 4-Phenylbut-3-yn-1-yltosylate (5)**

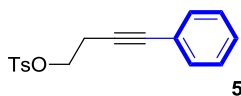

The reaction was run at room temperature for 12 h to give **6** (hexanes/EtOAc = 5/1) in 71% yield as a pale yellow oil. Its spectroscopic data were in accord

with those reported in the literature [4].  $^1\text{H}$  NMR (400 MHz,  $\text{CDCl}_3$ )  $\delta$  7.81 (d,  $J$  = 7.6 Hz, 2H), 7.32–7.26 (m, 7H), 4.19 (t,  $J$  = 6.8 Hz, 1H), 2.79 (t,  $J$  = 6.8 Hz, 2H), 2.42 (s, 3H);  $^{13}\text{C}$  NMR (100 MHz,  $\text{CDCl}_3$ )  $\delta$  145.0, 132.9, 131.7, 130.0, 128.3, 128.2, 128.0, 123.0, 83.9, 82.7, 67.8, 21.7, 20.4.

**(10) 4-Methyl-*N,N*-bis(3-phenylprop-2-ynyl)benzenesulfonamide (6)**

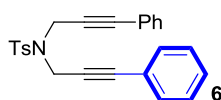

The reaction was run at room temperature for 12 h to give **6** (hexanes/EtOAc = 5/1) in 71% yield as a pale yellow oil. Its spectroscopic data were in accord with those reported in the literature [5].  $^1\text{H}$  NMR (400 MHz,  $\text{CDCl}_3$ )  $\delta$  7.79 (d,  $J$  = 7.6 Hz, 2H), 7.31–7.20 (m, 12H), 7.27 (s, 5H), 4.45 (s, 4H), 2.31 (s, 3H);  $^{13}\text{C}$  NMR (100 MHz,  $\text{CDCl}_3$ )  $\delta$  143.8, 135.3, 131.7, 129.6, 128.5, 128.1, 128.0, 122.2, 85.8, 81.6, 37.5, 21.4.

**(8) (3-Benzyloxyprop-1-ynyl)benzene (7)**

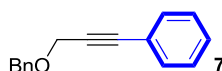

The reaction was run at 50 °C for 12 h to give **7** (hexanes/EtOAc = 5/1) in 71% yield as a yellow oil. Its spectroscopic data were in accord with those reported in the literature [6].  $^1\text{H}$  NMR (400 MHz,  $\text{CDCl}_3$ )  $\delta$  7.48–7.46 (m, 2H), 7.41–7.30 (m, 8H), 4.69 (s, 2H), 4.41 (s, 2H);  $^{13}\text{C}$  NMR (100 MHz,  $\text{CDCl}_3$ )  $\delta$  137.4, 131.8, 128.4, 128.3, 128.1, 127.9, 122.6, 86.5, 85.0, 71.6, 57.9.

(11) ***N*-Allyl-4-methyl-*N*-(3-phenylprop-2-ynyl)benzenesulfonamide (8)**

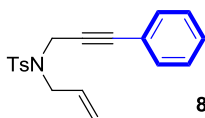

The reaction was run at room temperature for 12 h to give **8** (hexanes/EtOAc = 5/1) in 82% yield as a white solid. Its spectroscopic data were in accord with those reported in the literature [7].  $^1\text{H}$  NMR (400 MHz,  $\text{CDCl}_3$ )  $\delta$  7.77 (d,  $J = 7.6$  Hz, 2H ), 7.30–7.22 (m, 5H), 7.05 (d,  $J = 7.2$  Hz, 2H), 5.87–5.73 (m, 1H), 5.35–5.27 (m, 2H), 4.31 (s, 2H), 3.88 (d,  $J = 6.4$  Hz, 2H), 2.34 (s, 3H);  $^{13}\text{C}$  NMR (100 MHz,  $\text{CDCl}_3$ )  $\delta$  143.5, 135.8, 132.0, 131.4, 129.5, 128.4, 128.1, 127.8, 122.1, 120.0, 85.7, 81.6, 49.2, 36.7, 21.4.

#### 4. References

1. Nieto-Oberhuber, C.; Pérez-Galán, P.; Herrero-Gómez, E.; Lauterbach, T.; Rodríguez, C.; López, S.; Bour, C.; Rosellón, A.; Cárdenas, D. J.; Echavarren, A. M. *J. Am. Chem. Soc.* **2008**, *130*, 269. doi:10.1021/ja075794x
2. Lee, S. I.; Park, S. Y.; Park, J. H.; Jung, I. G.; Choi, S. Y.; Chung, Y. K. *J. Org. Chem.* **2006**, *71*, 91. doi:10.1021/jo051685u
3. Shintani, R.; Nakatsu, H.; Takatsu, K.; Hayashi, T. *Chem.–Eur. J.* **2009**, *15*, 8692. doi:10.1002/chem.200901463
4. Collins, C. J.; Hanack, M.; Stutz, H.; Auchter, G.; Schoberth, W. *J. Org. Chem.* **1983**, *48*, 5260. doi:10.1021/jo00174a021
5. Lian, J.-J.; Chen, P.-C.; Lin, Y.-P.; Ting, H.-C.; Liu, R. *J. Am. Chem. Soc.* **2006**, *128*, 11372. doi:10.1021/ja0643826
6. Bolte, B.; Odabachian, Y.; Gagosz, F. *J. Am. Chem. Soc.* **2010**, *132*, 7294. doi:10.1021/ja1020469

7. Chen, M.; Weng, Y.; Guo, M.; Zhang, H.; Lei, A. *Angew. Chem., Int. Ed.* **2008**, *47*, 2279. doi:10.1002/anie.200704452

## 5. $^1\text{H}$ and $^{13}\text{C}$ NMR spectra

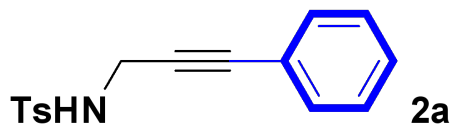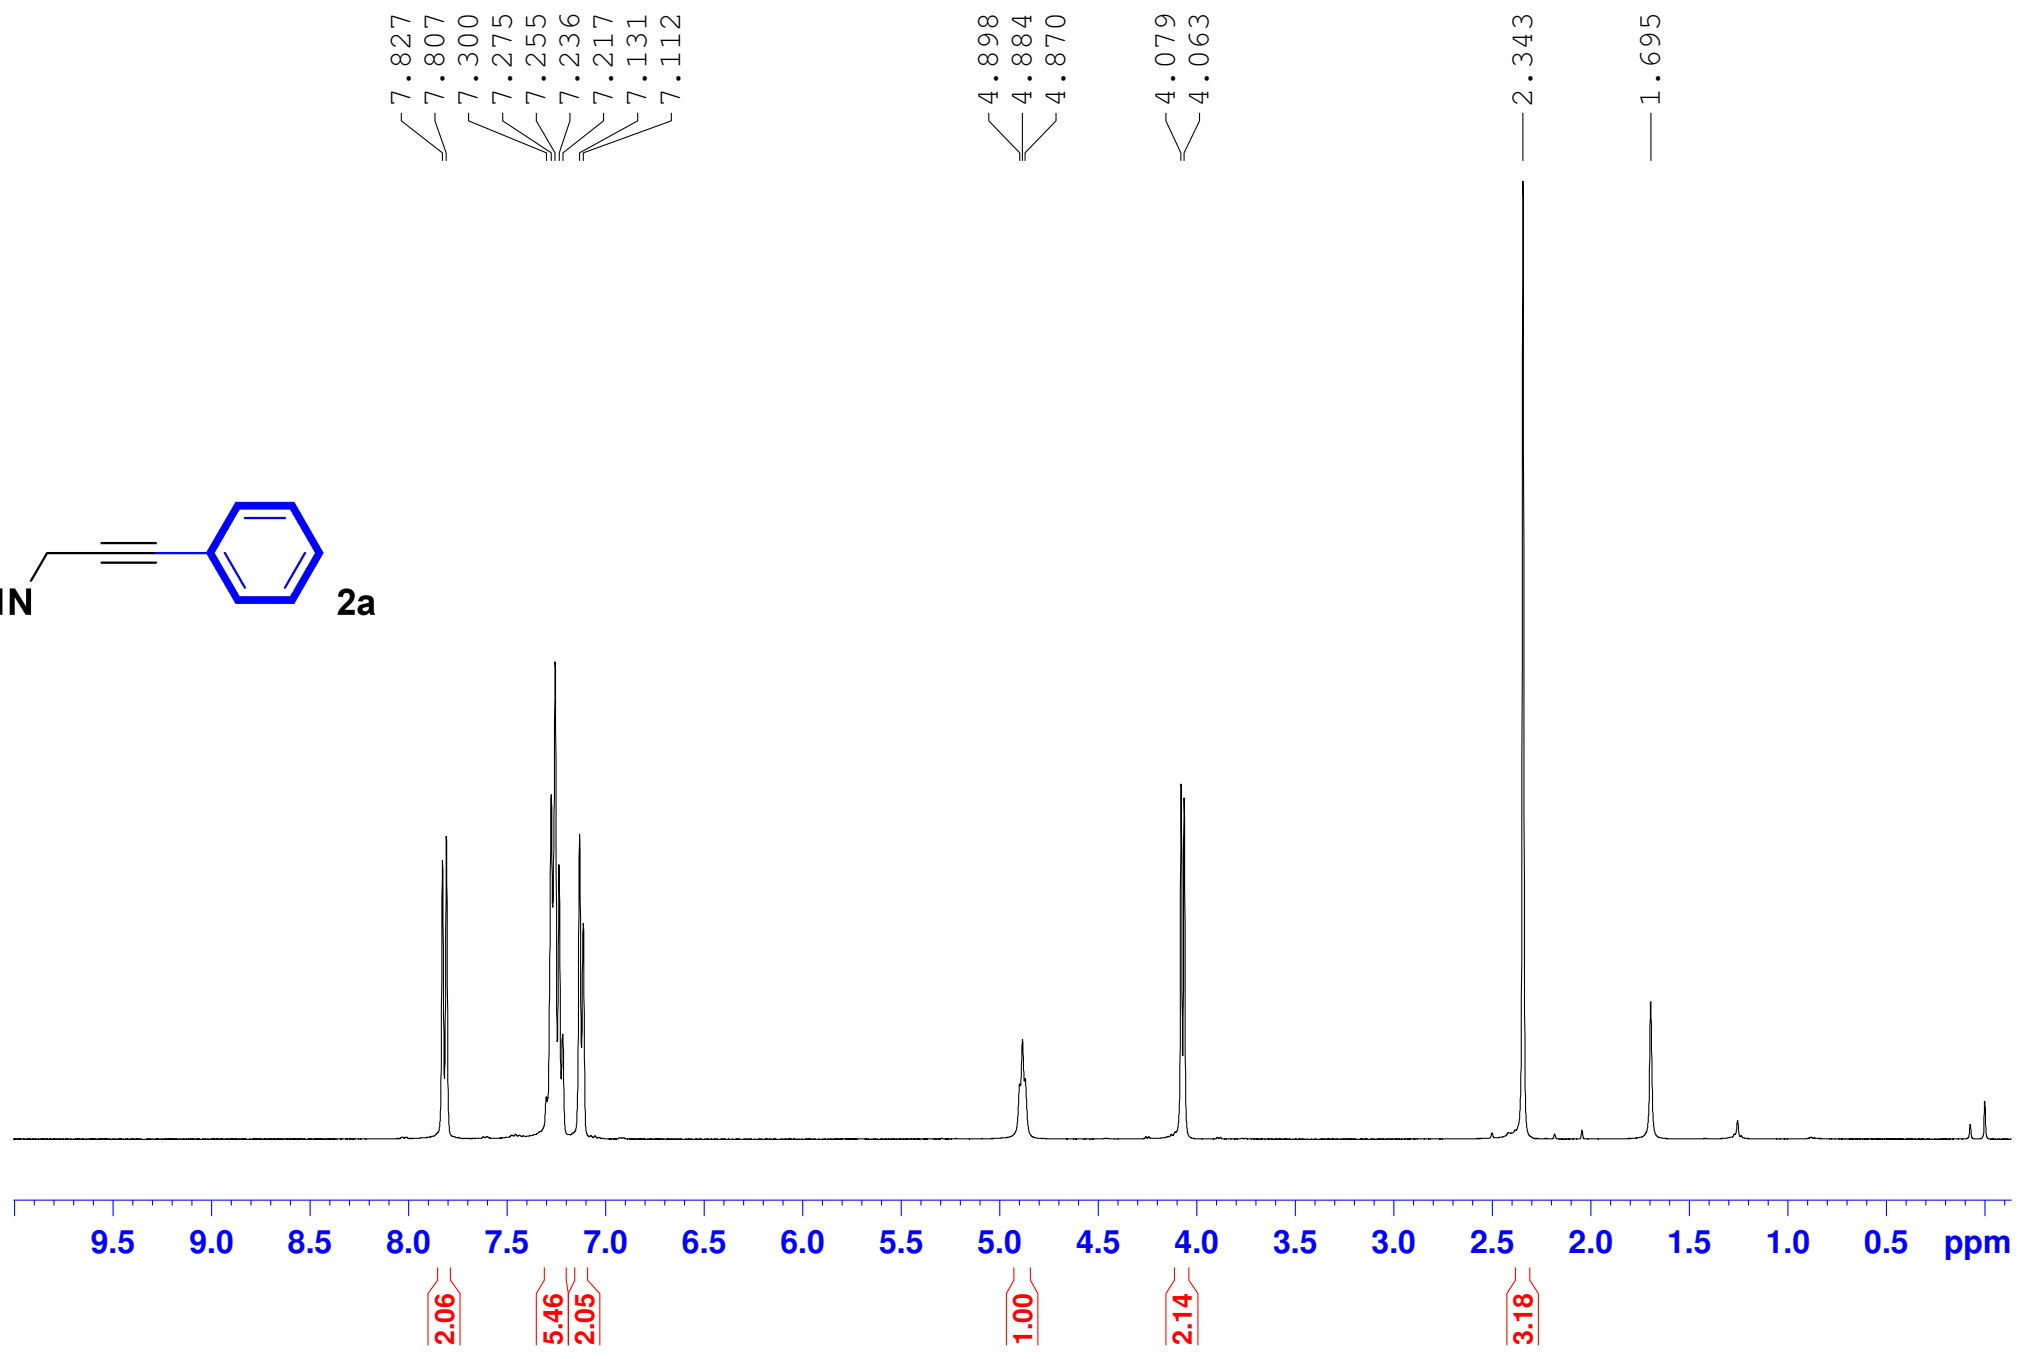

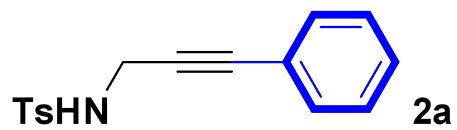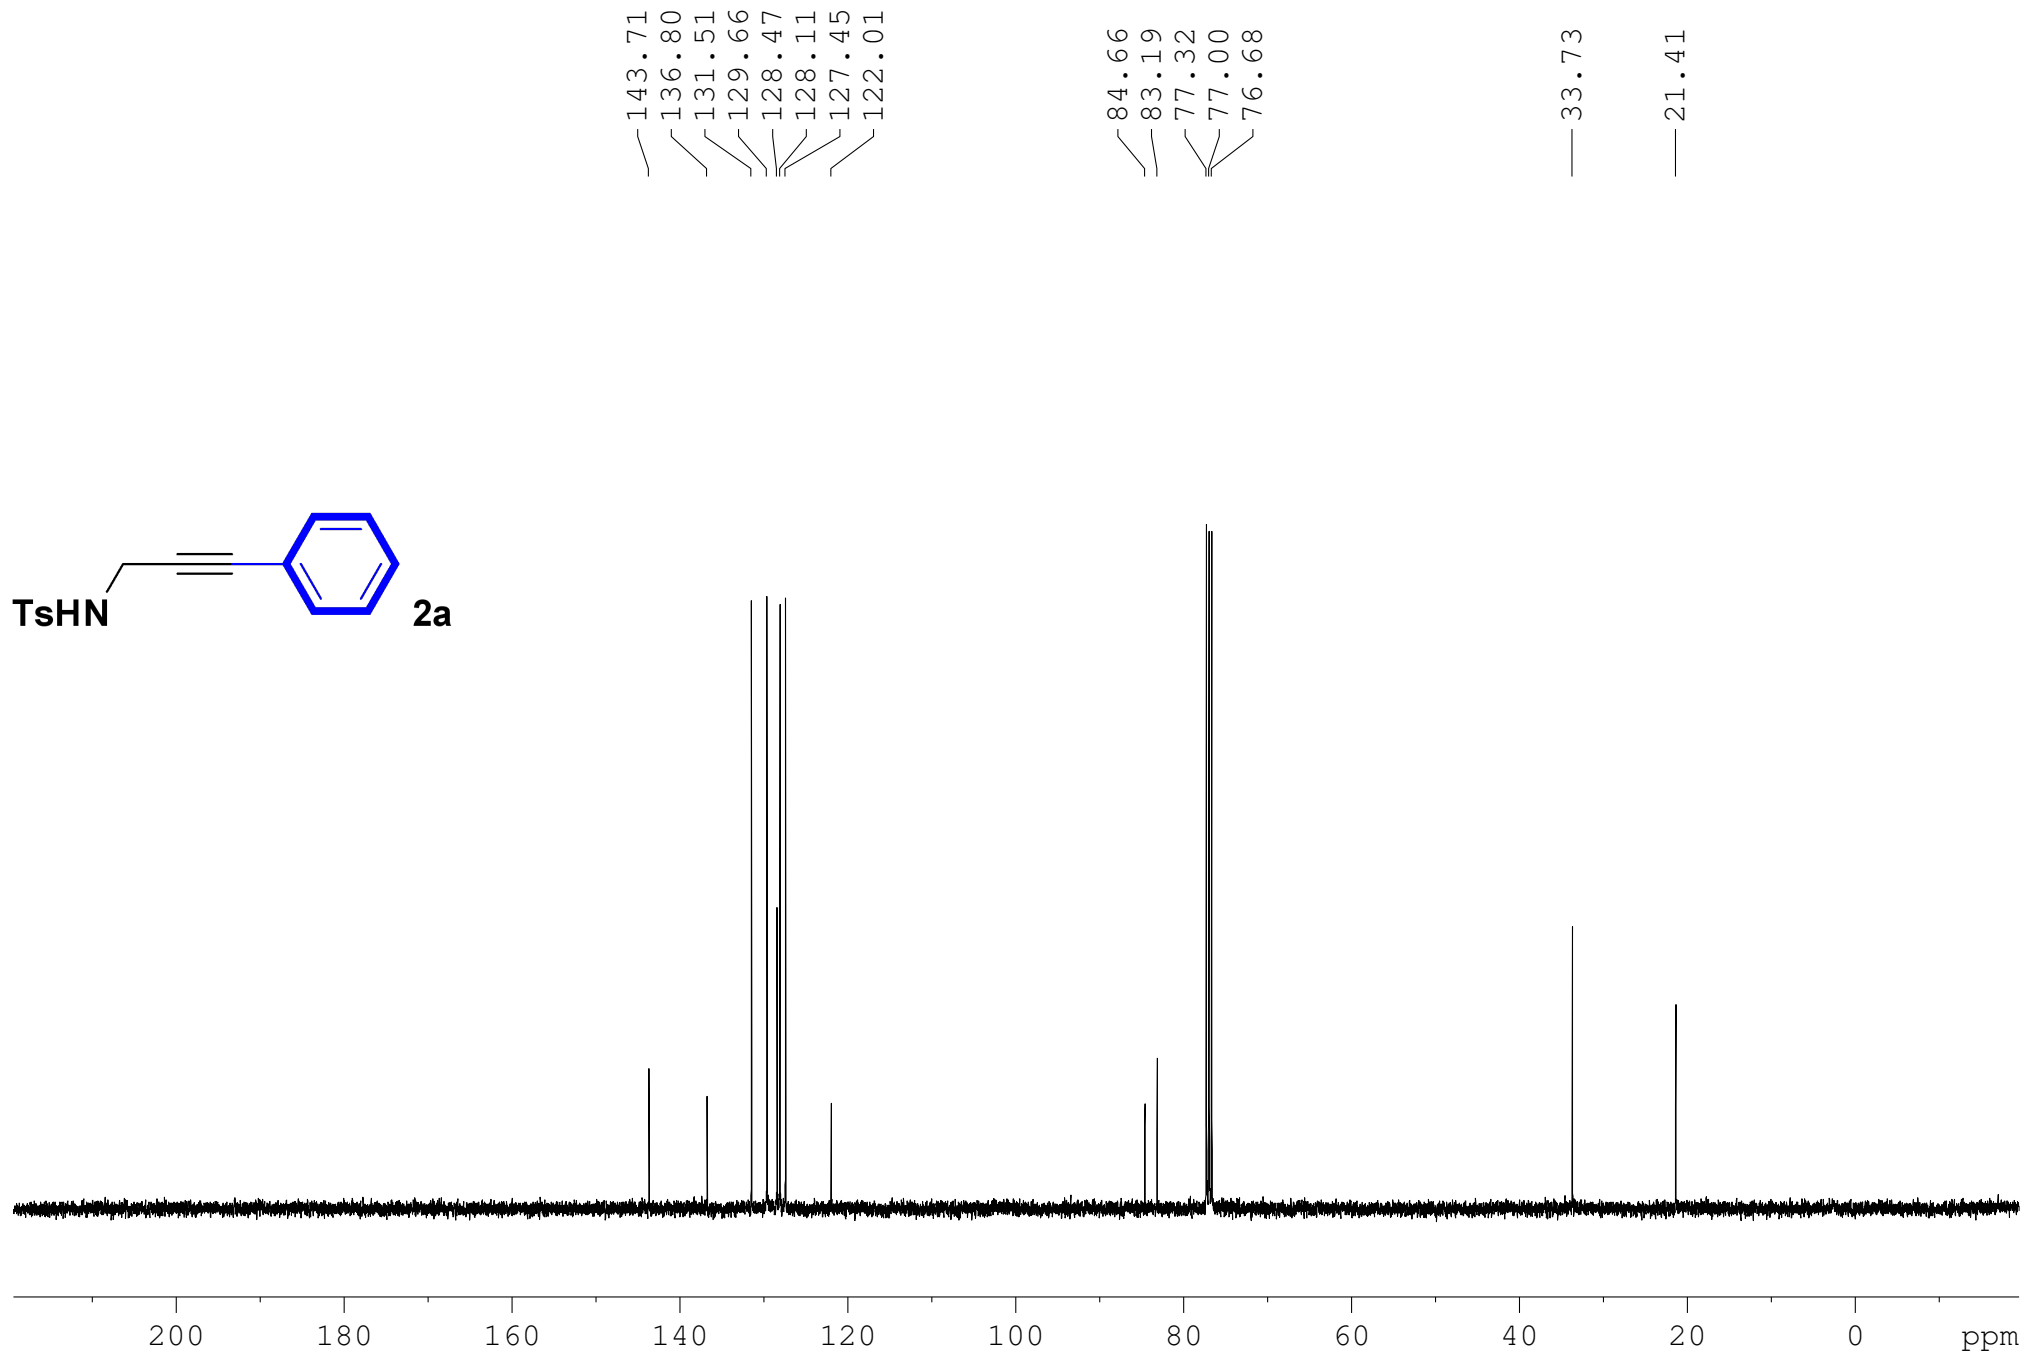

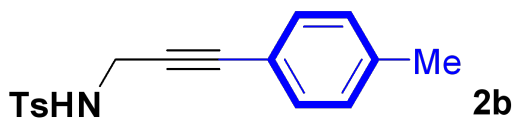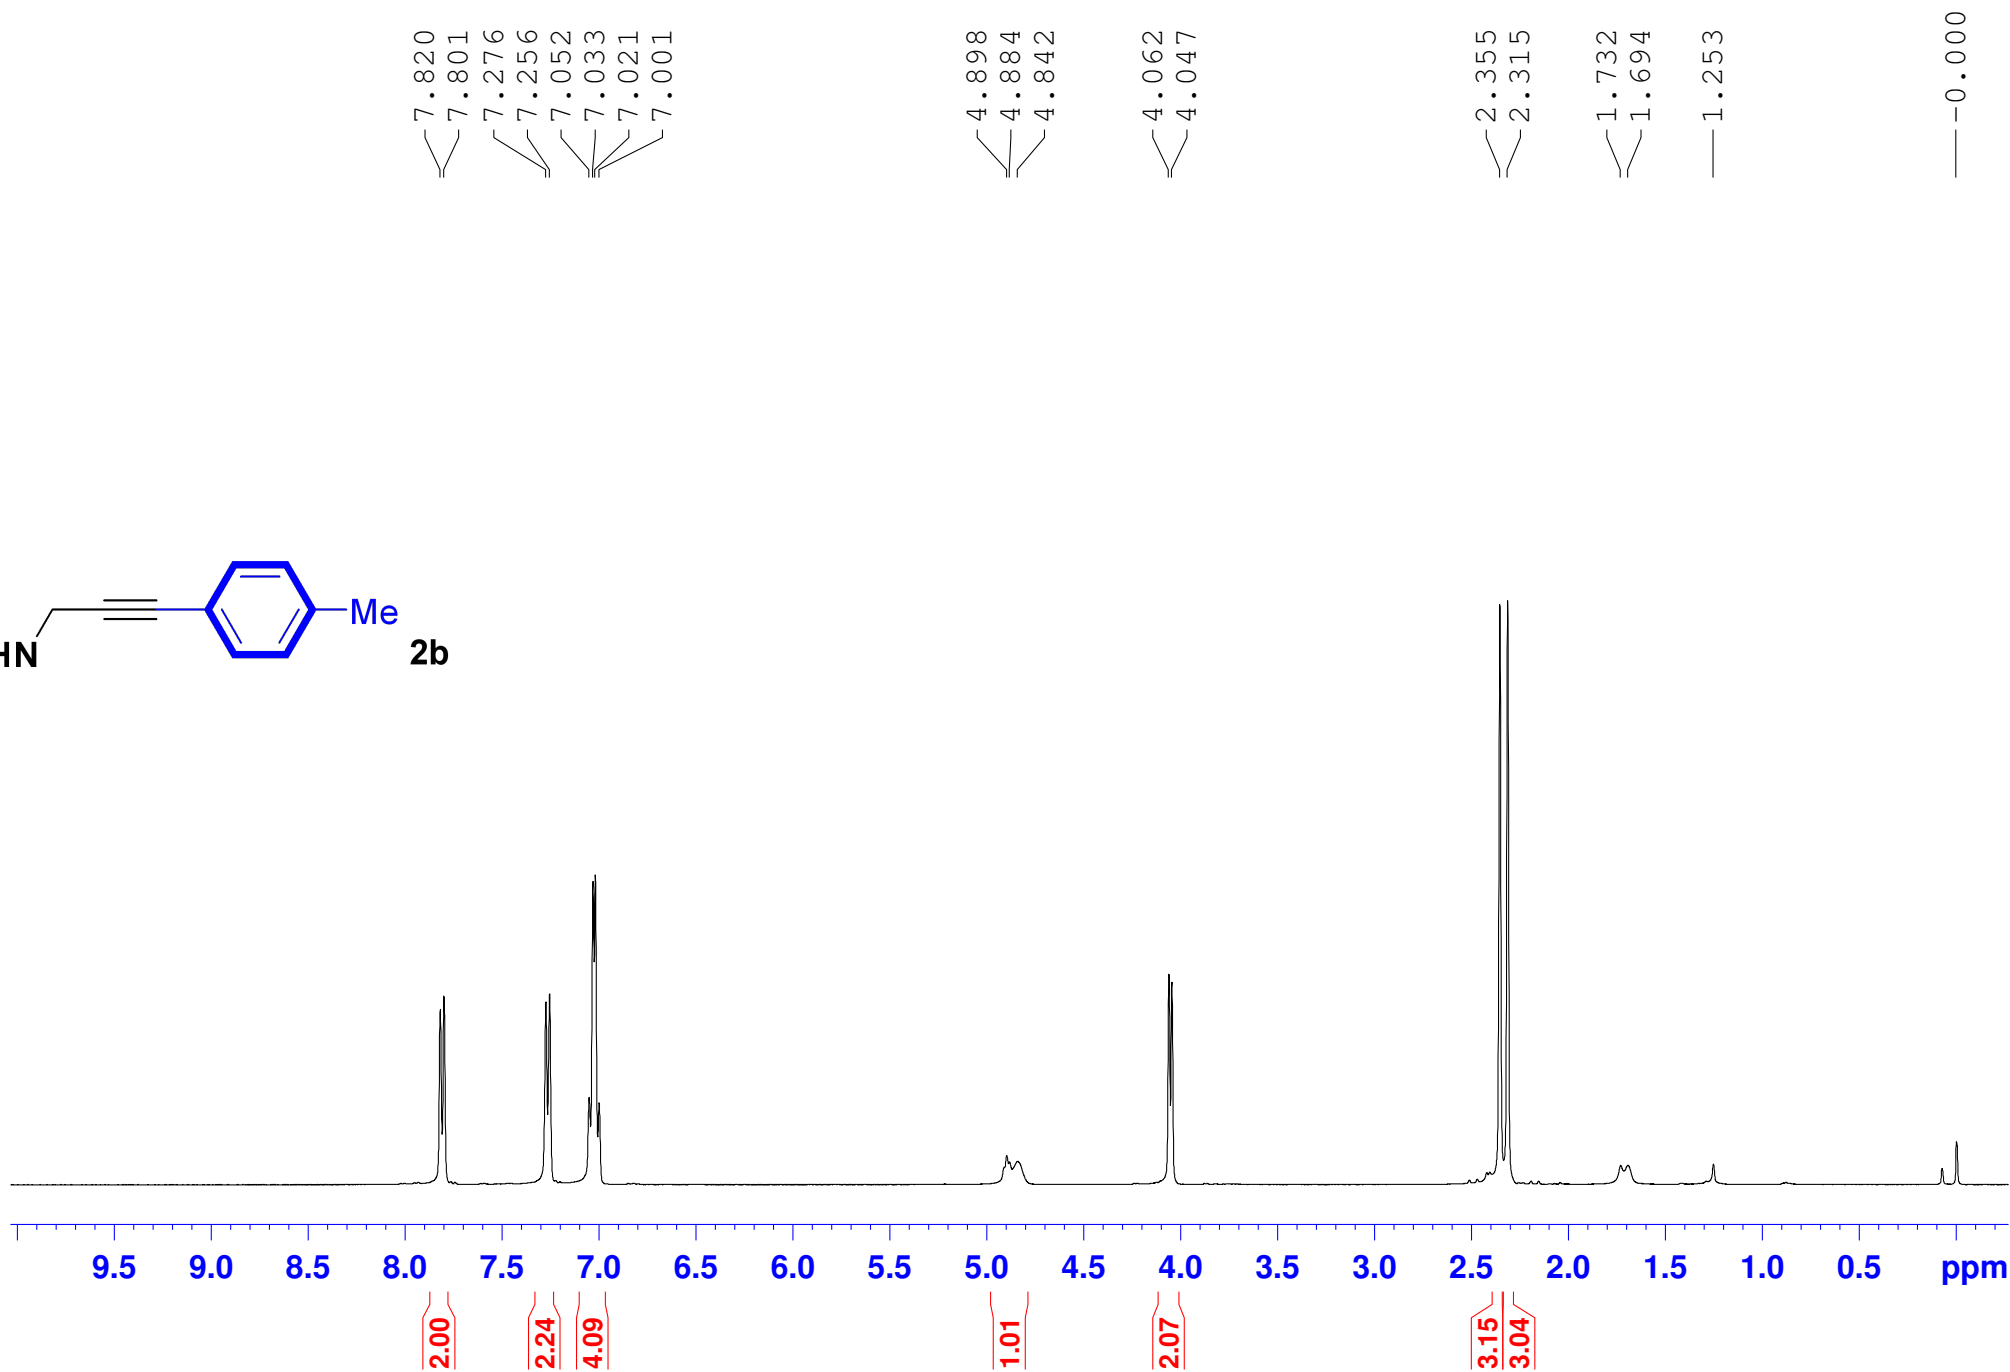



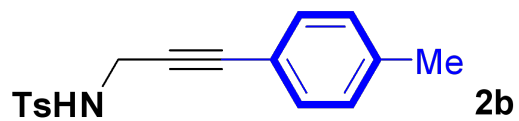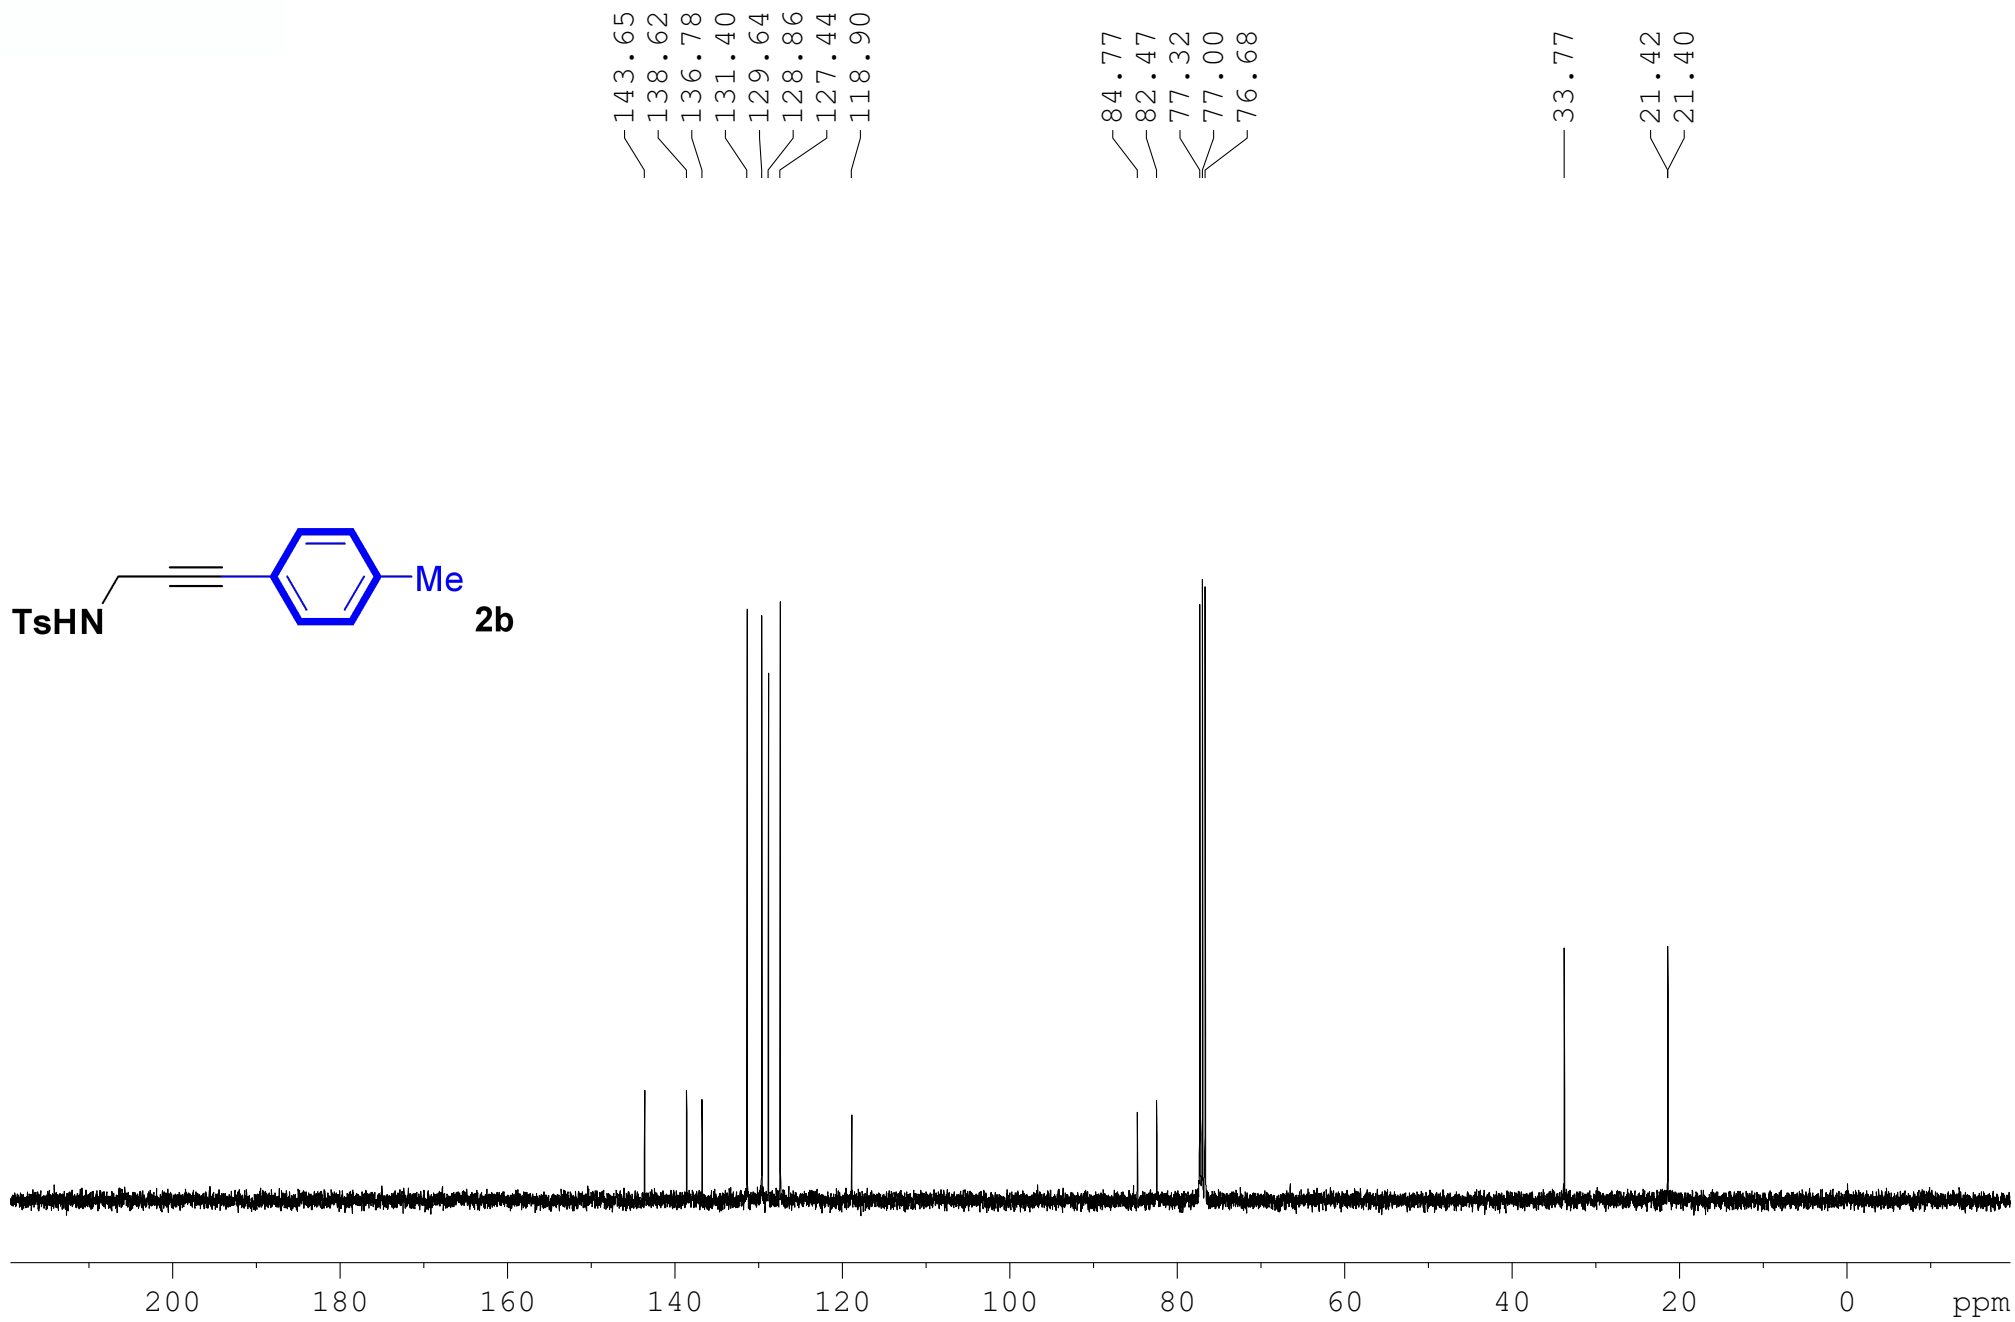

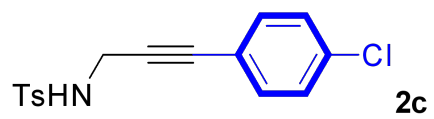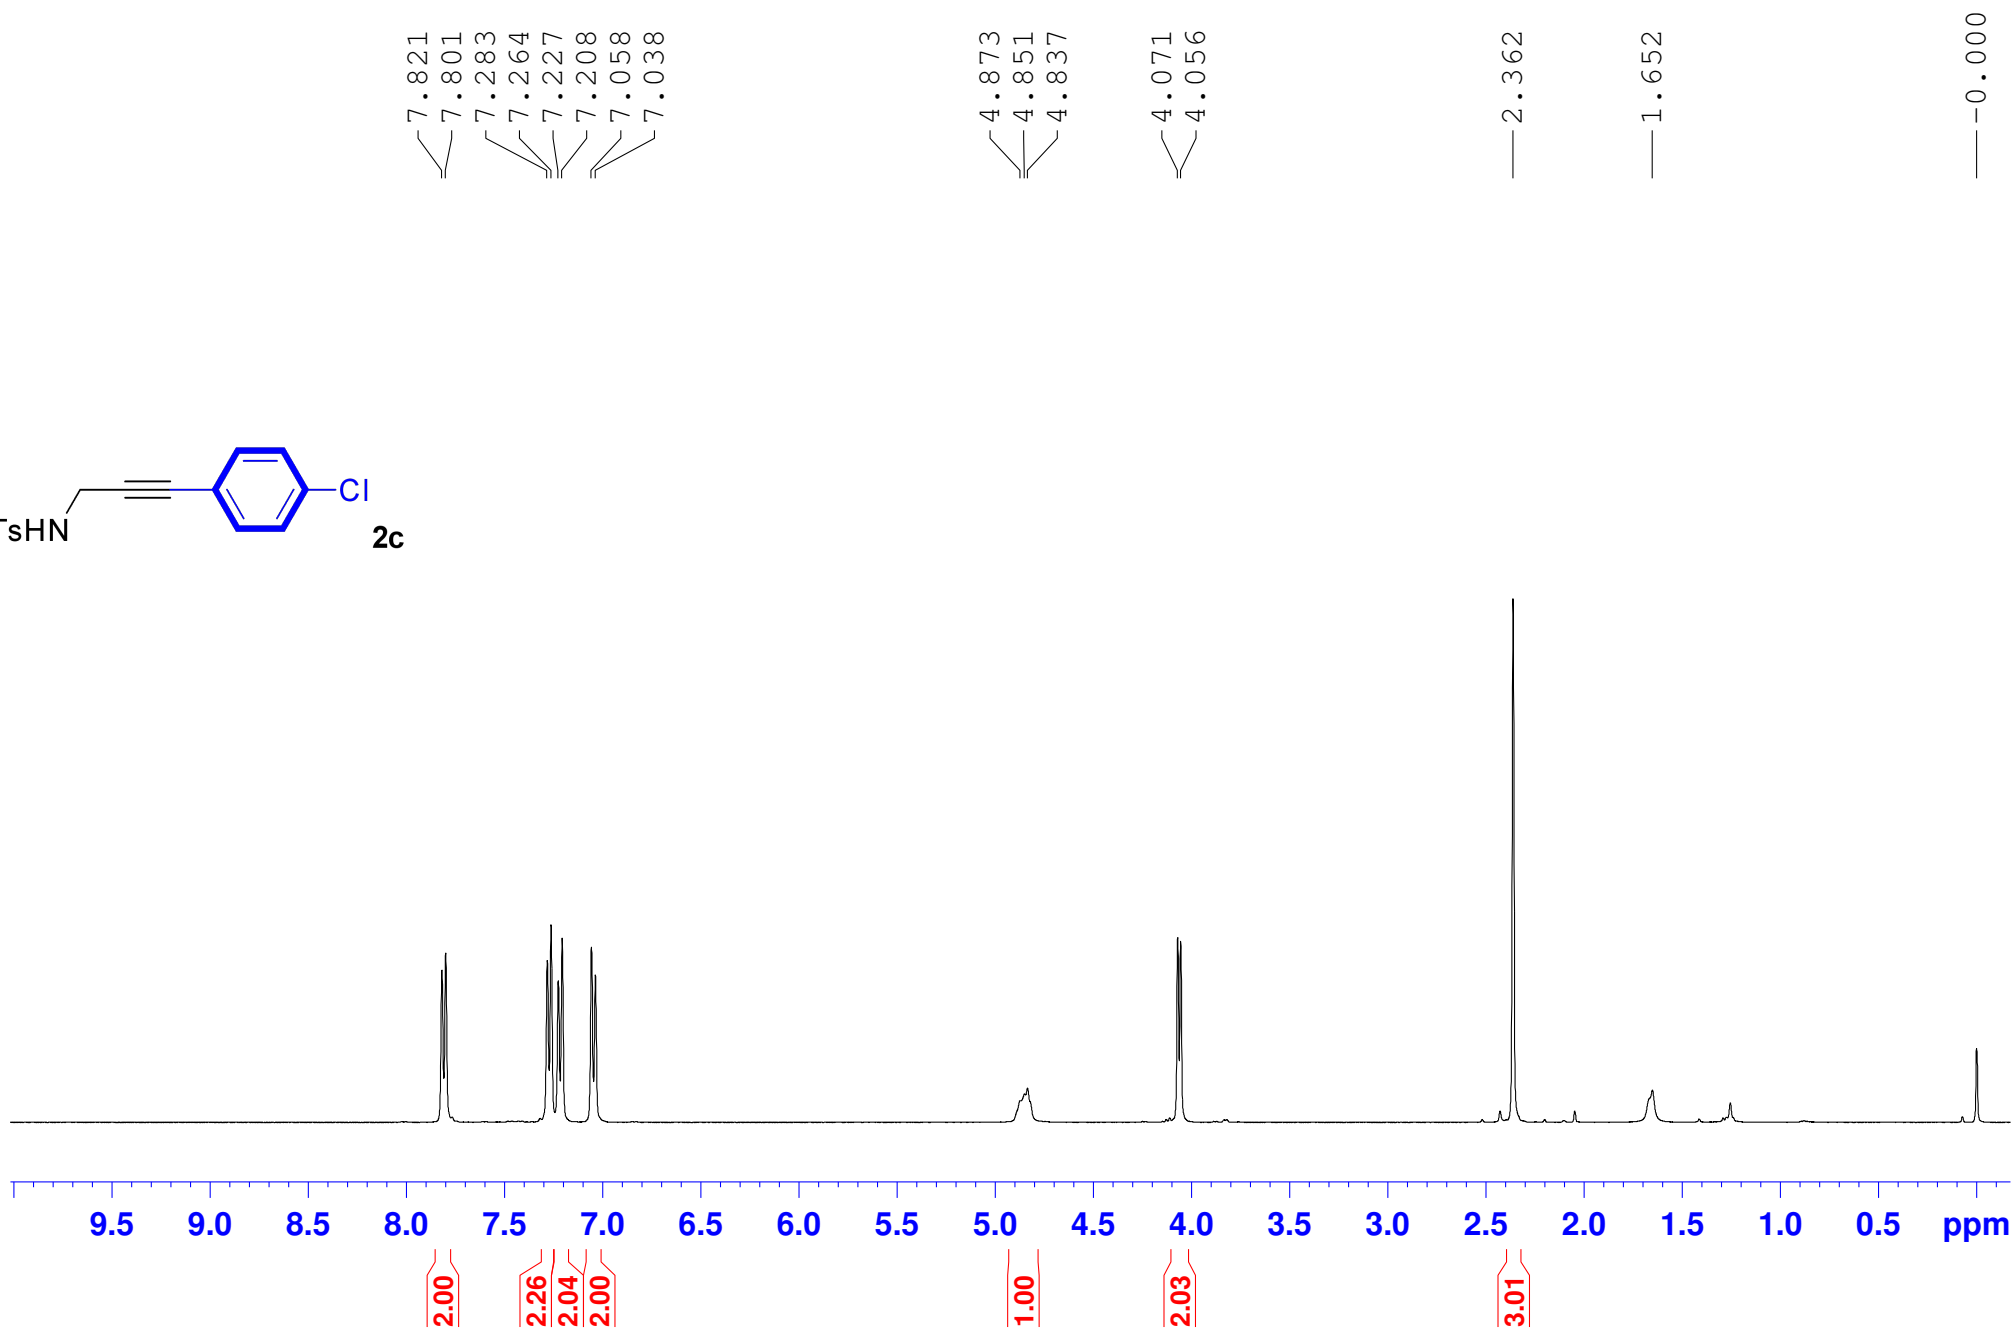

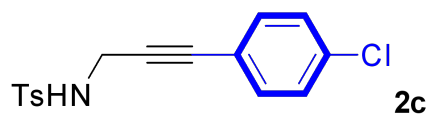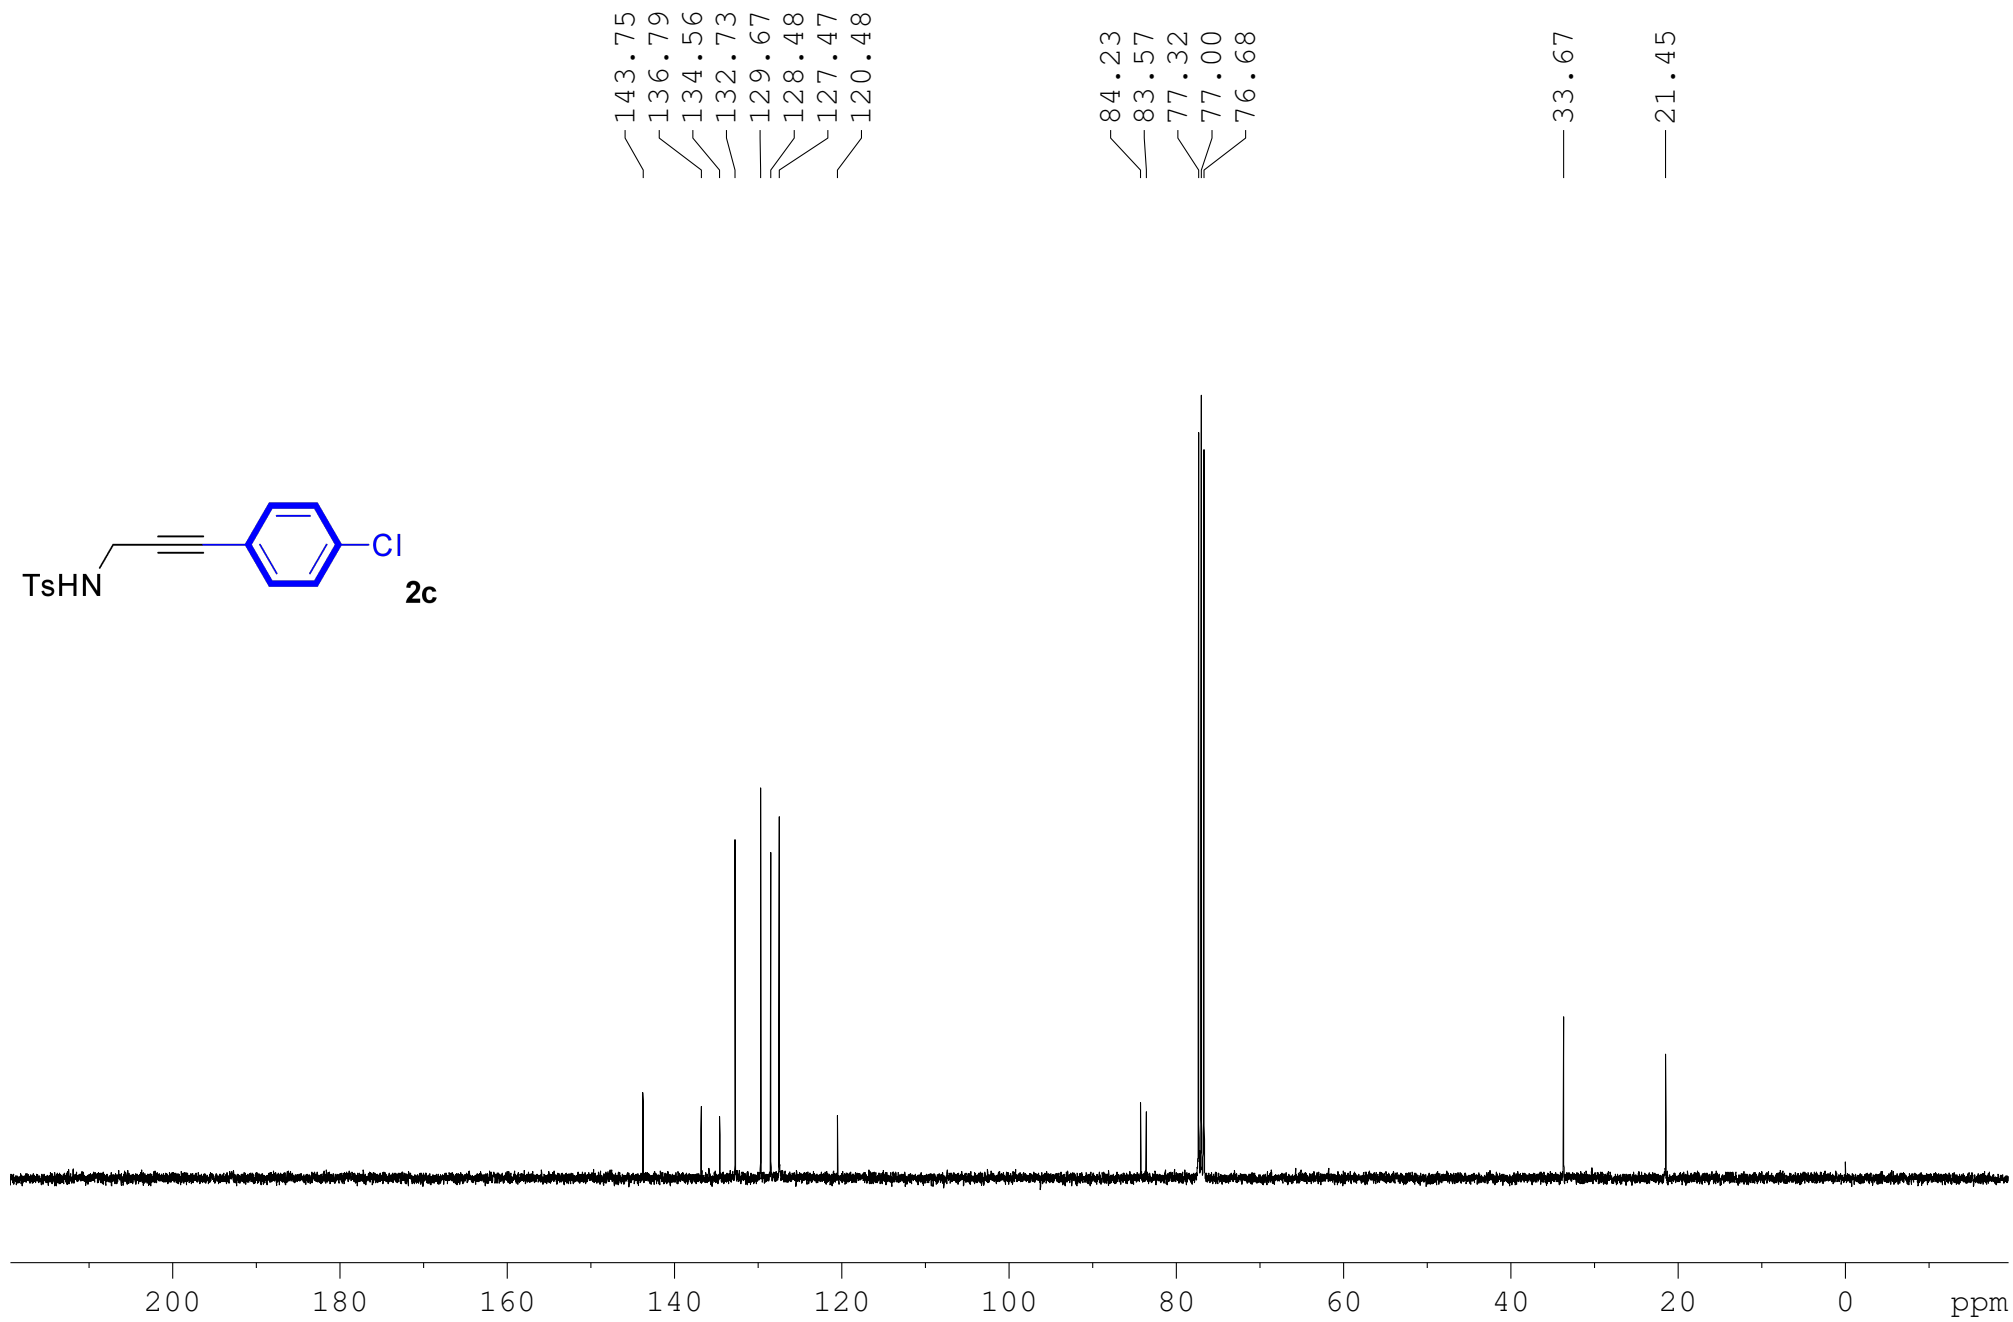

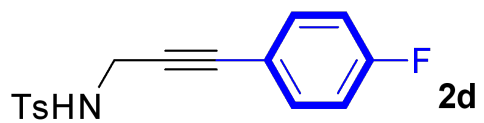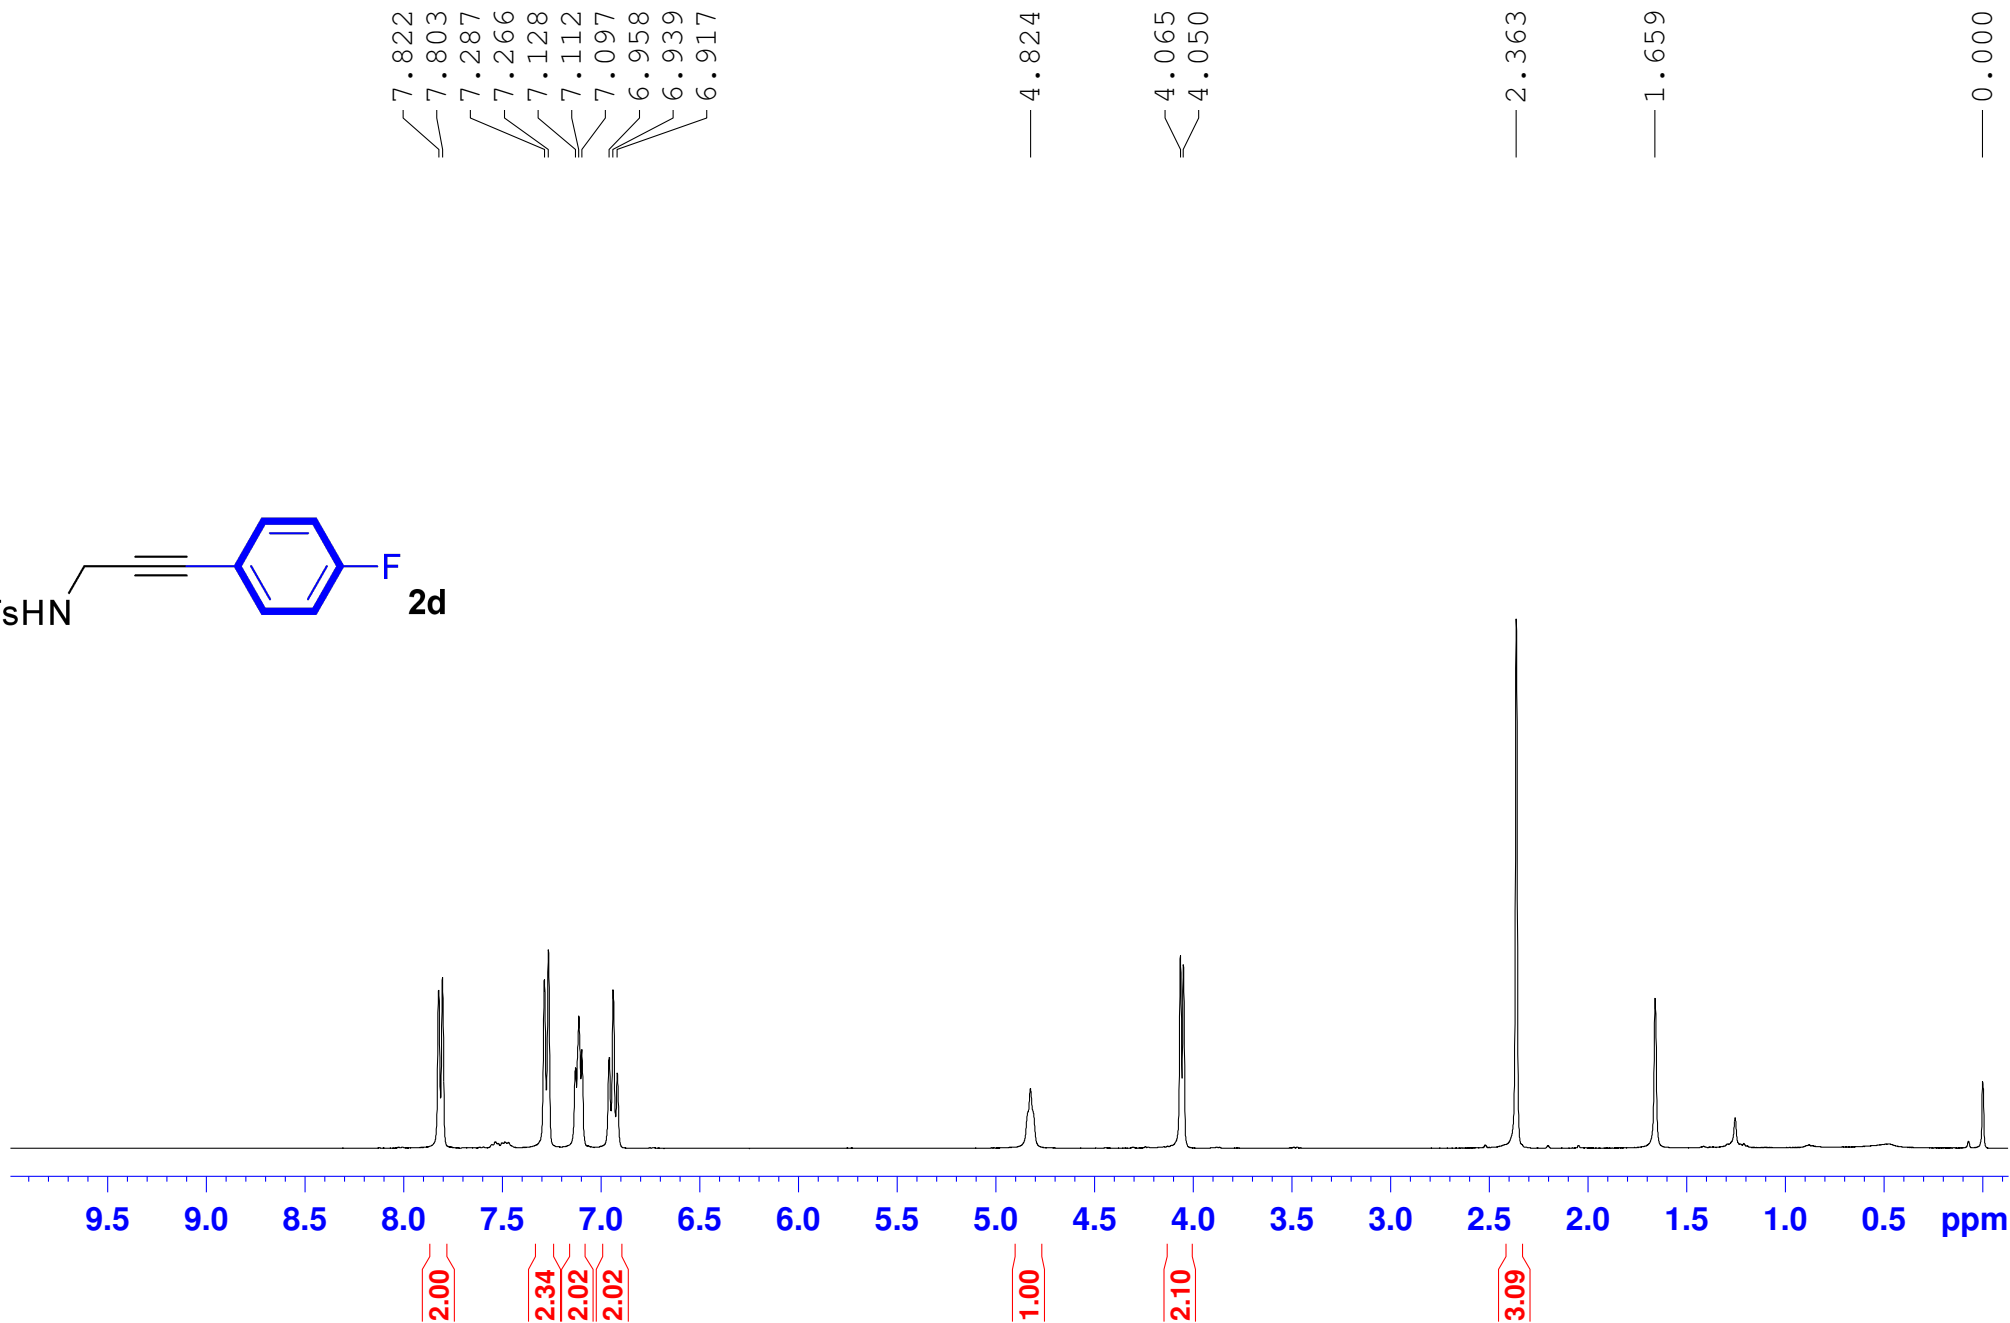

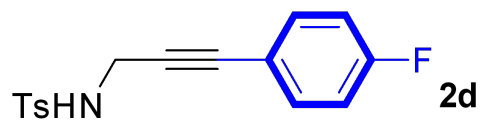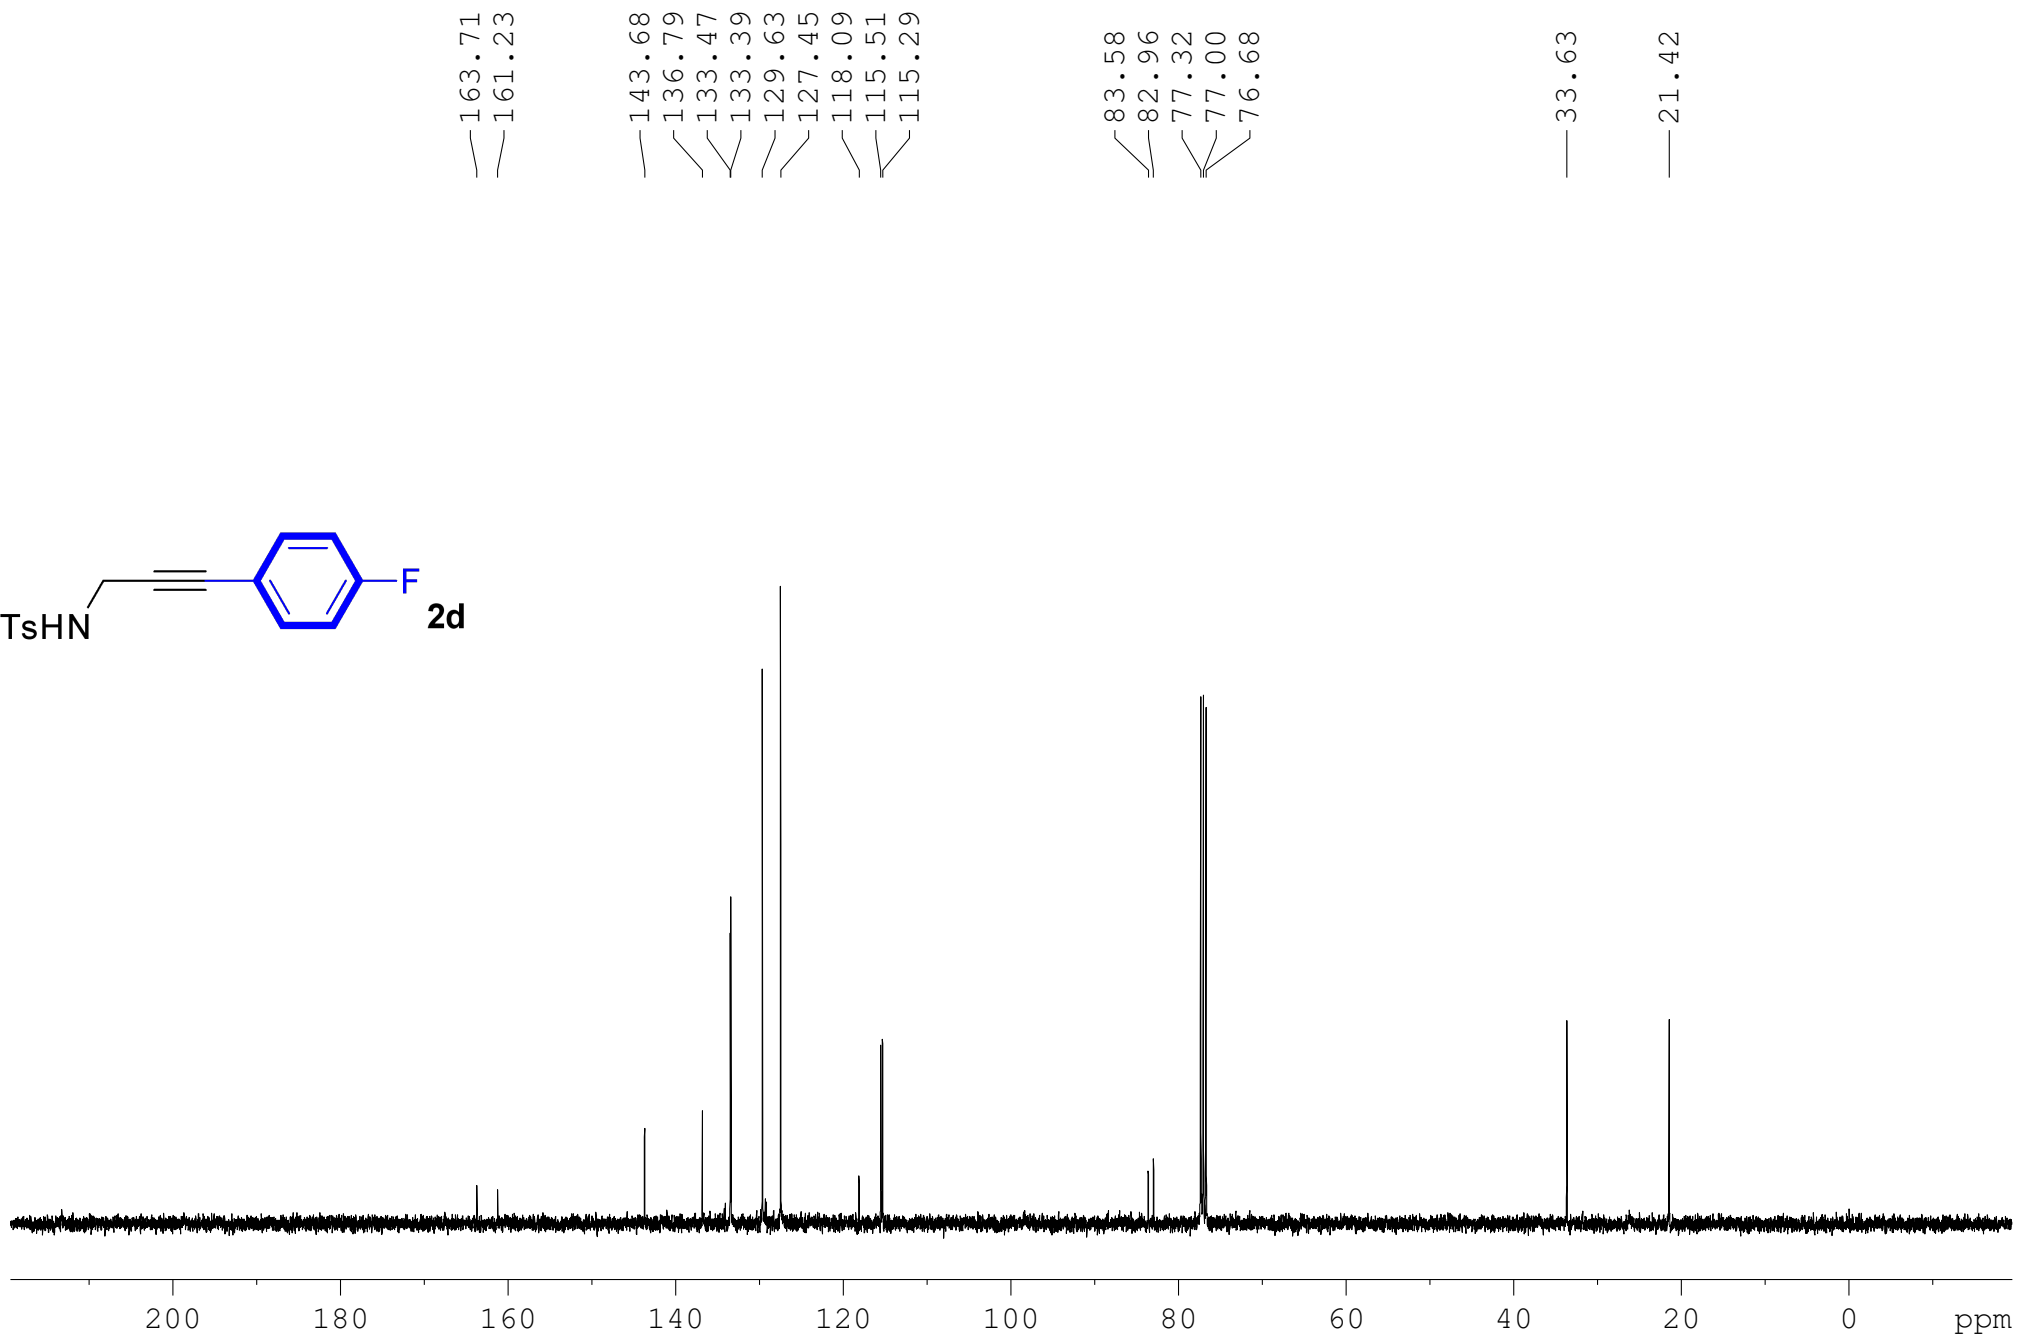

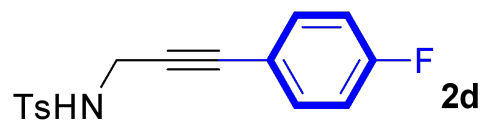

— -110.33

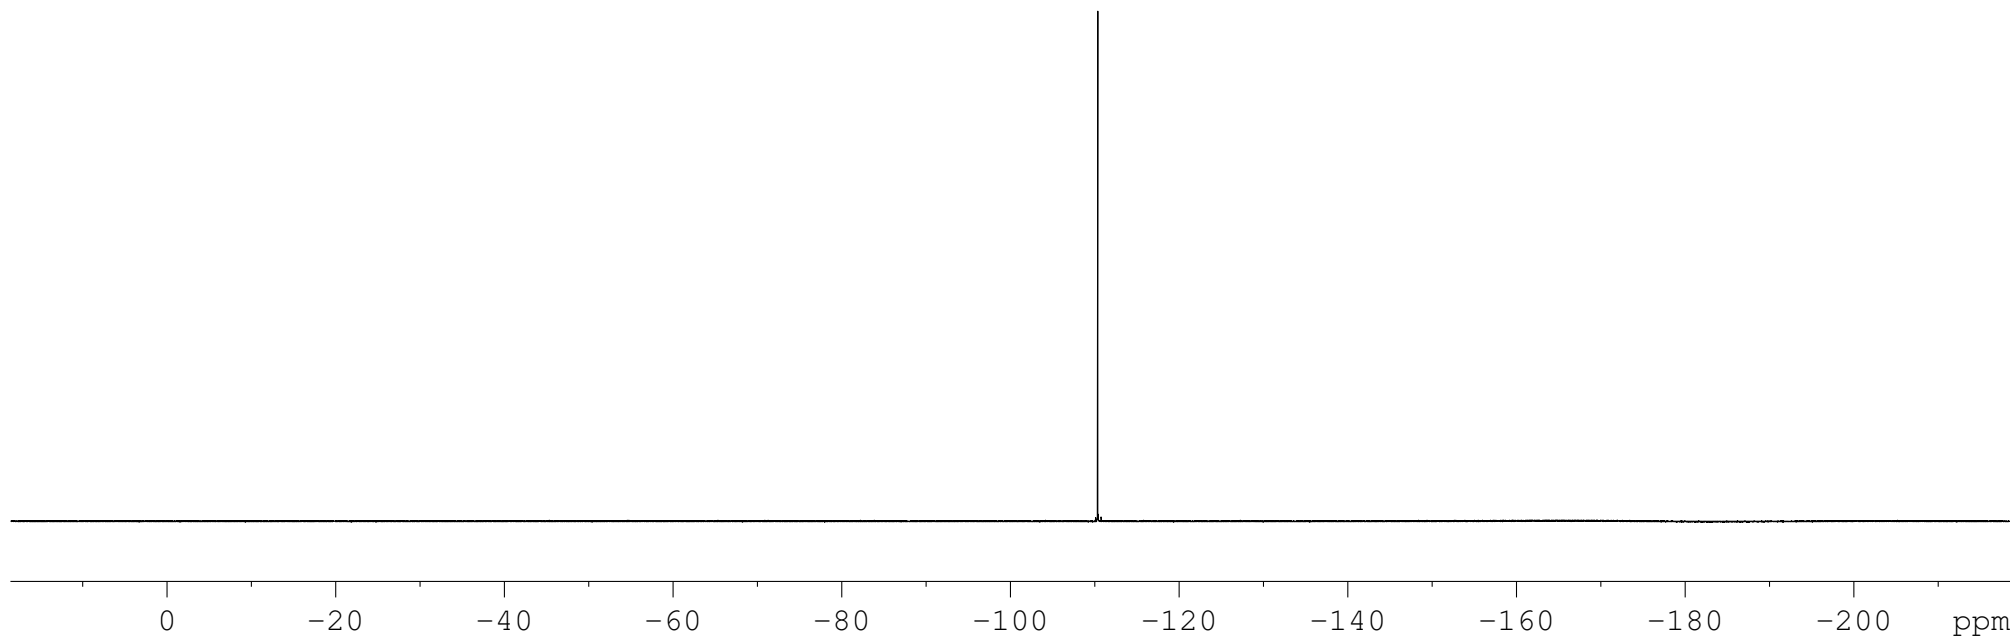

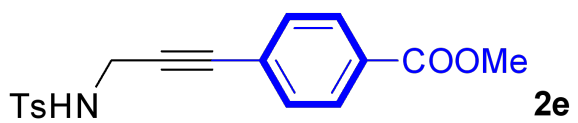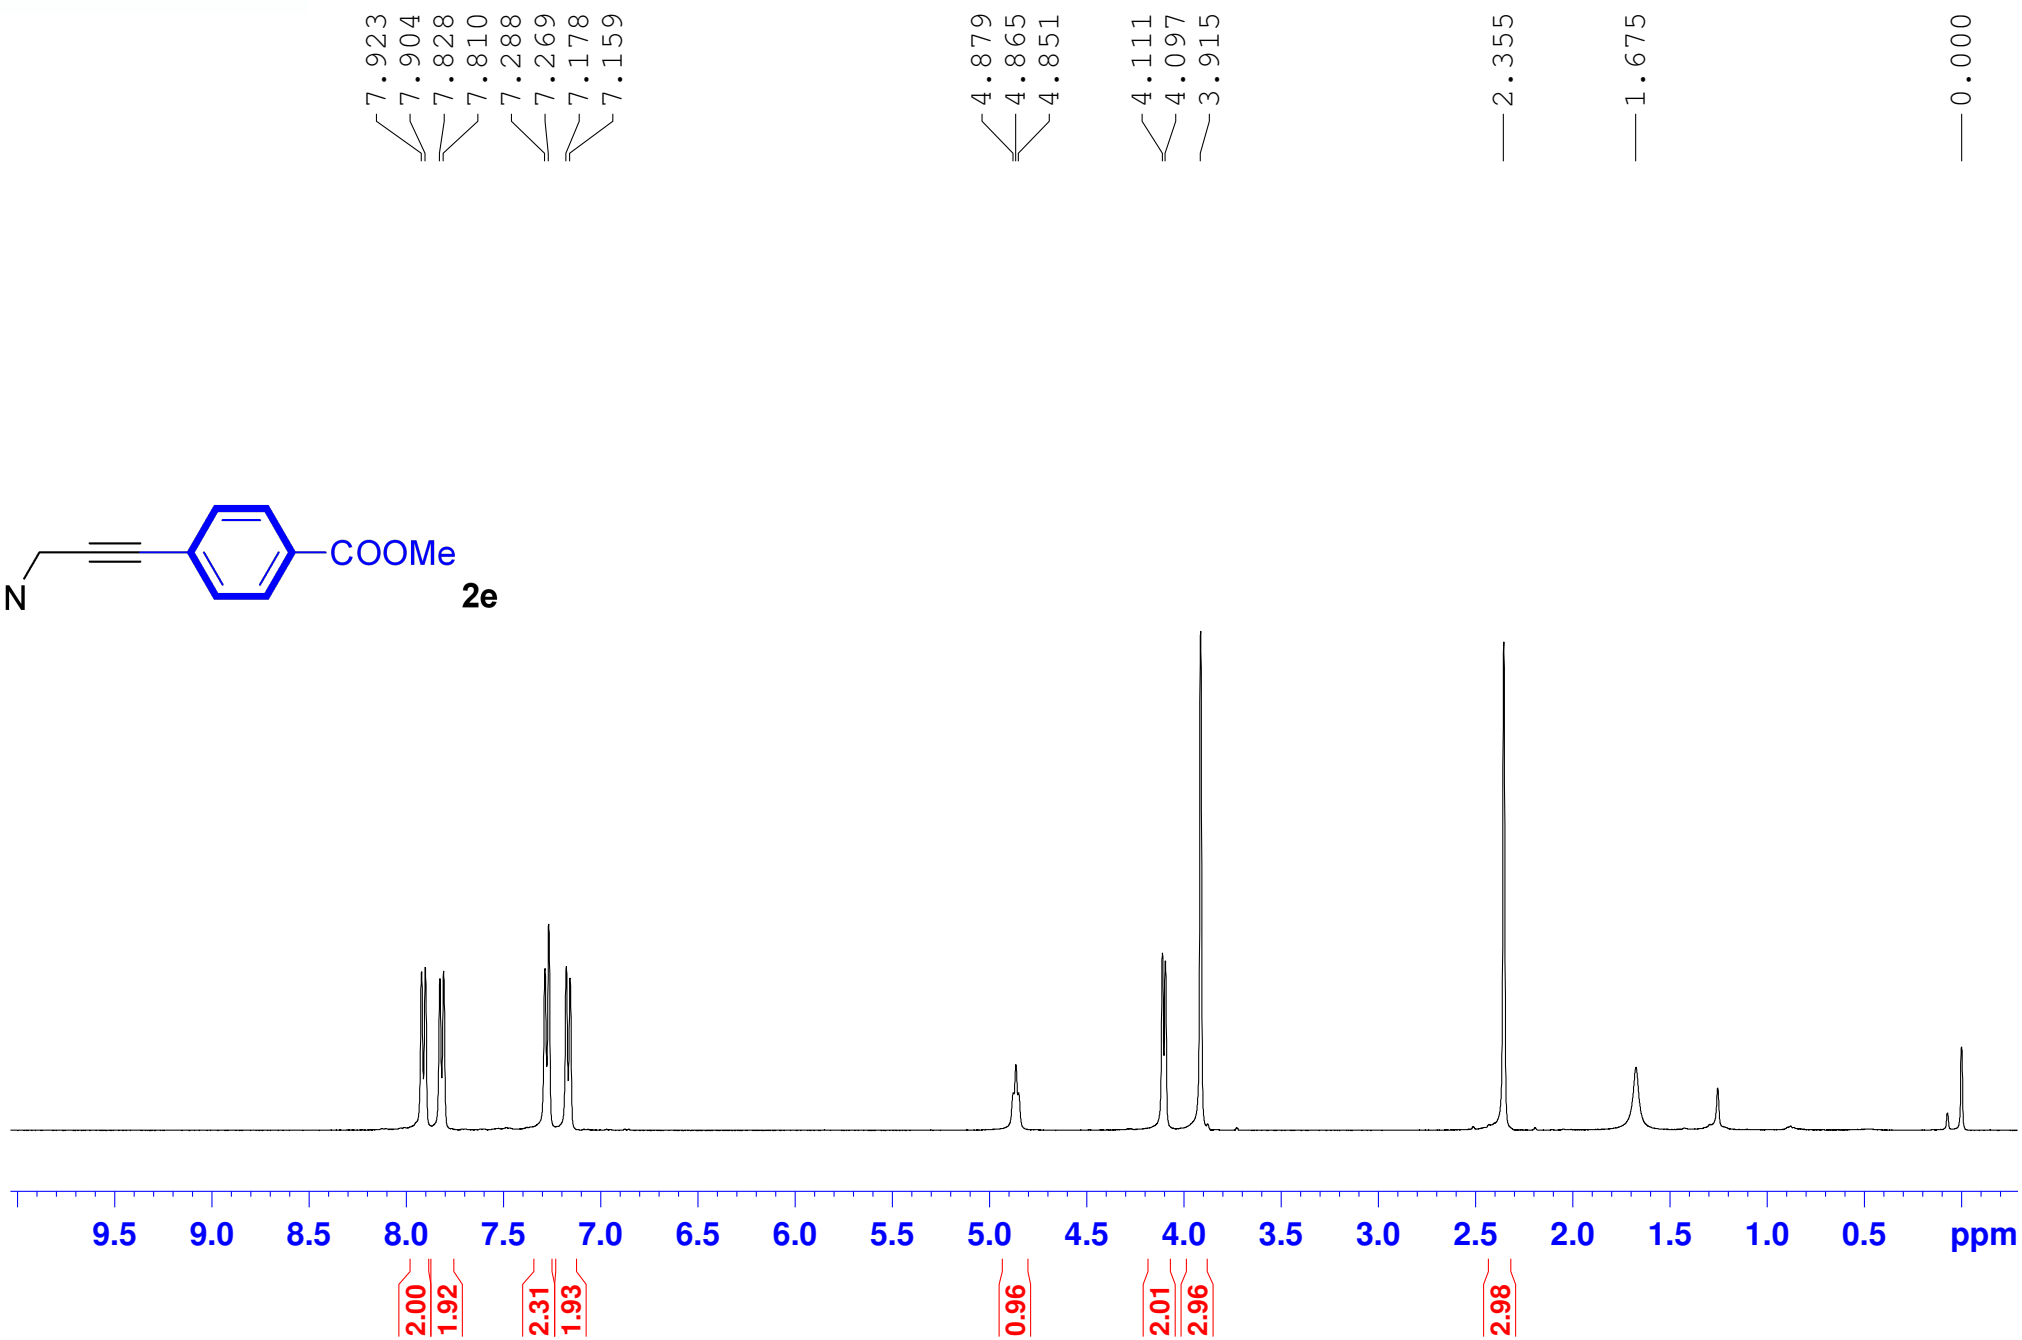

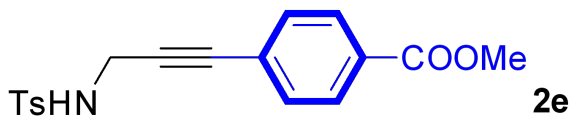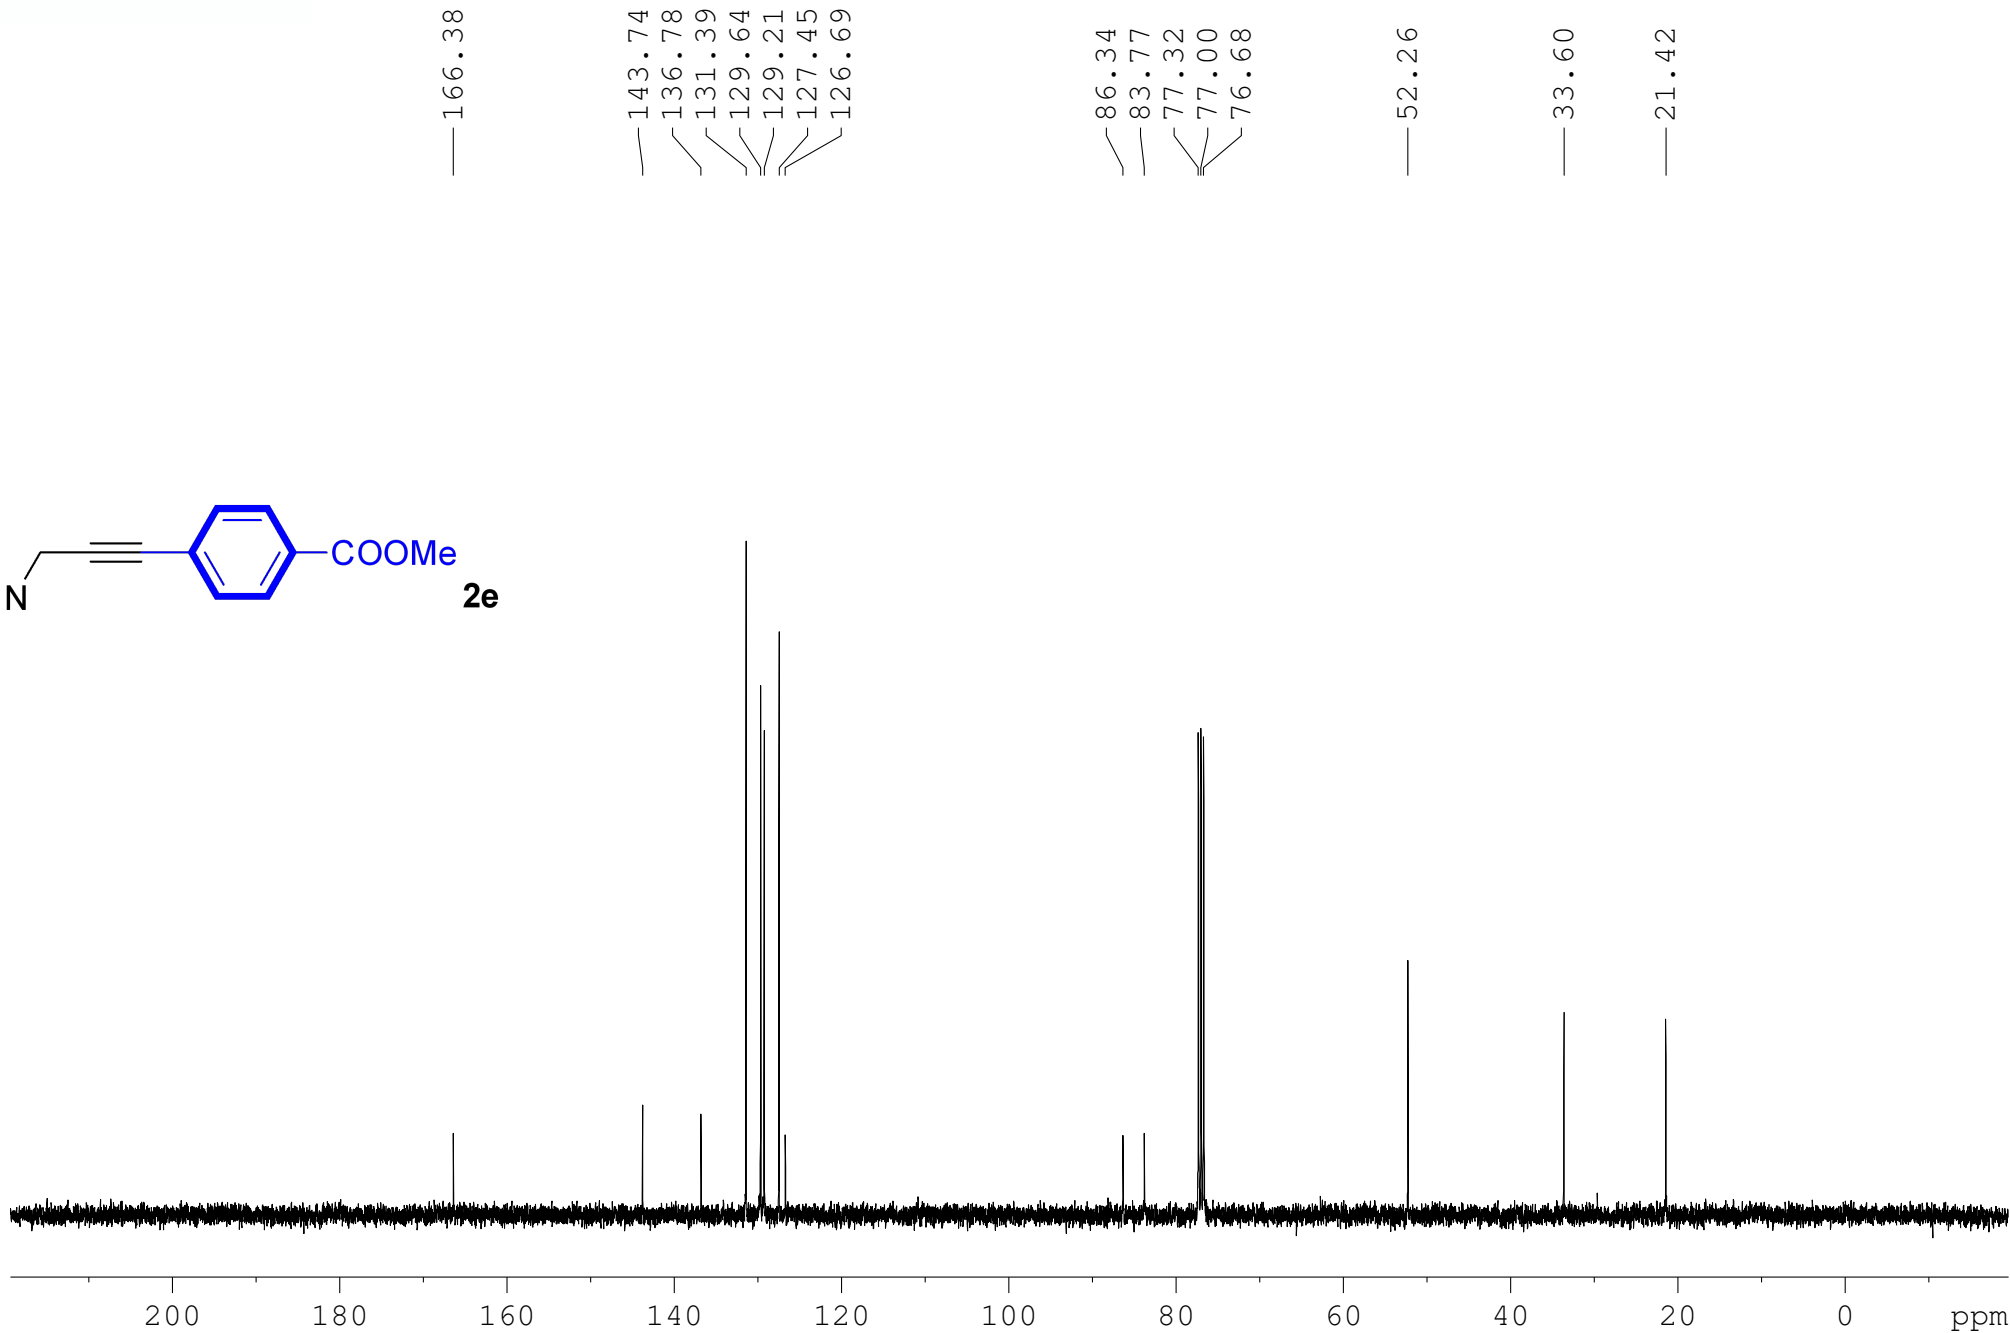



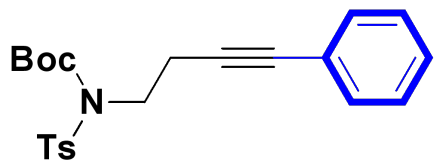

3

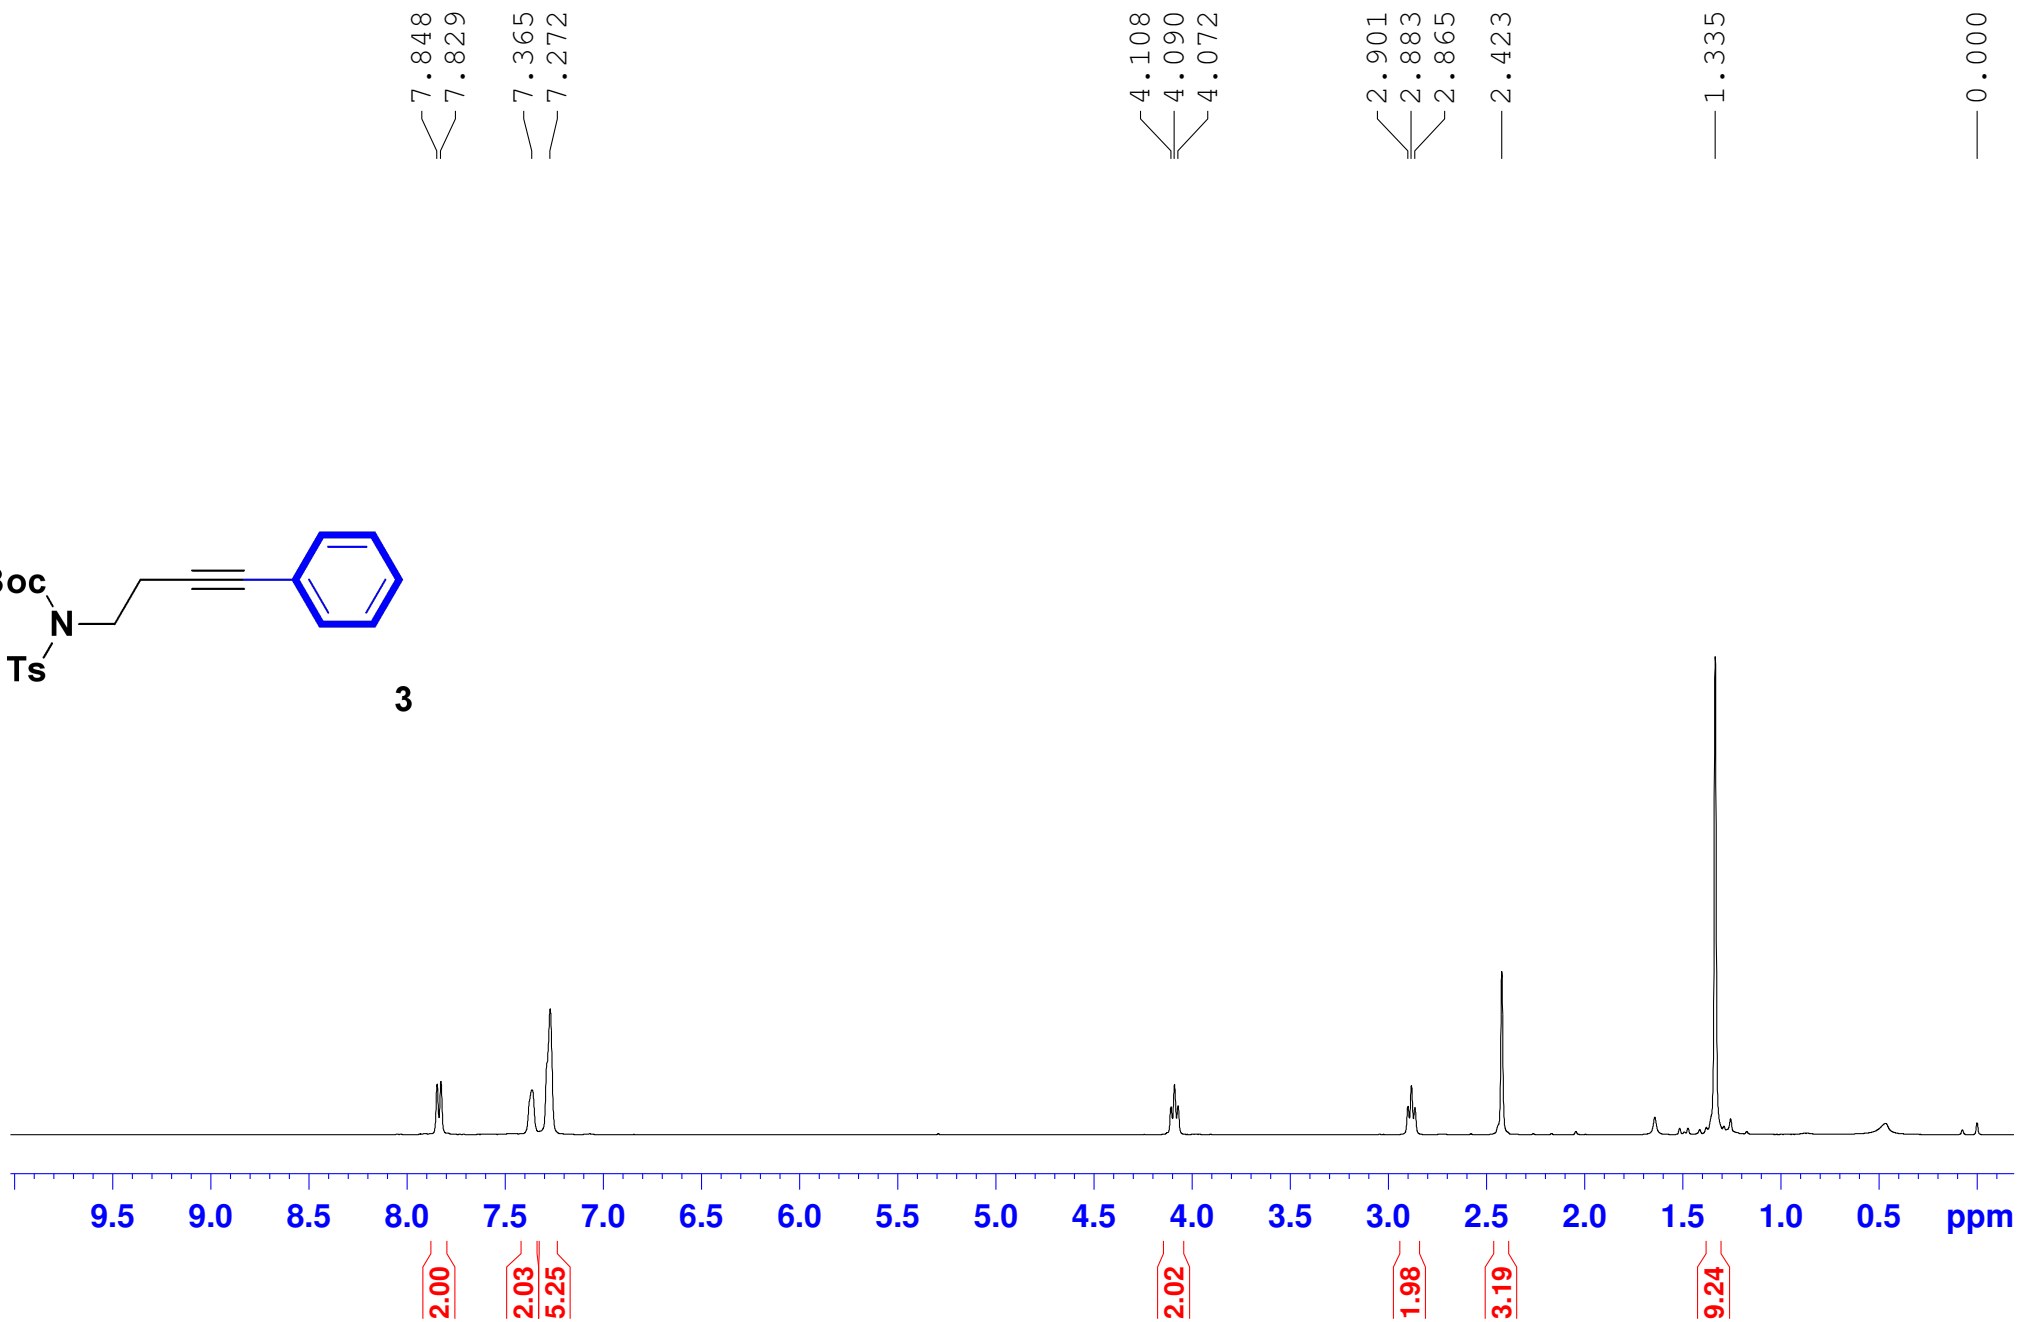

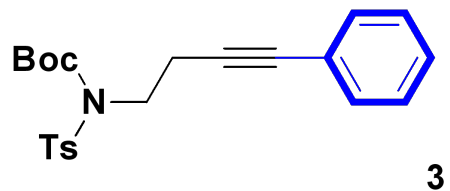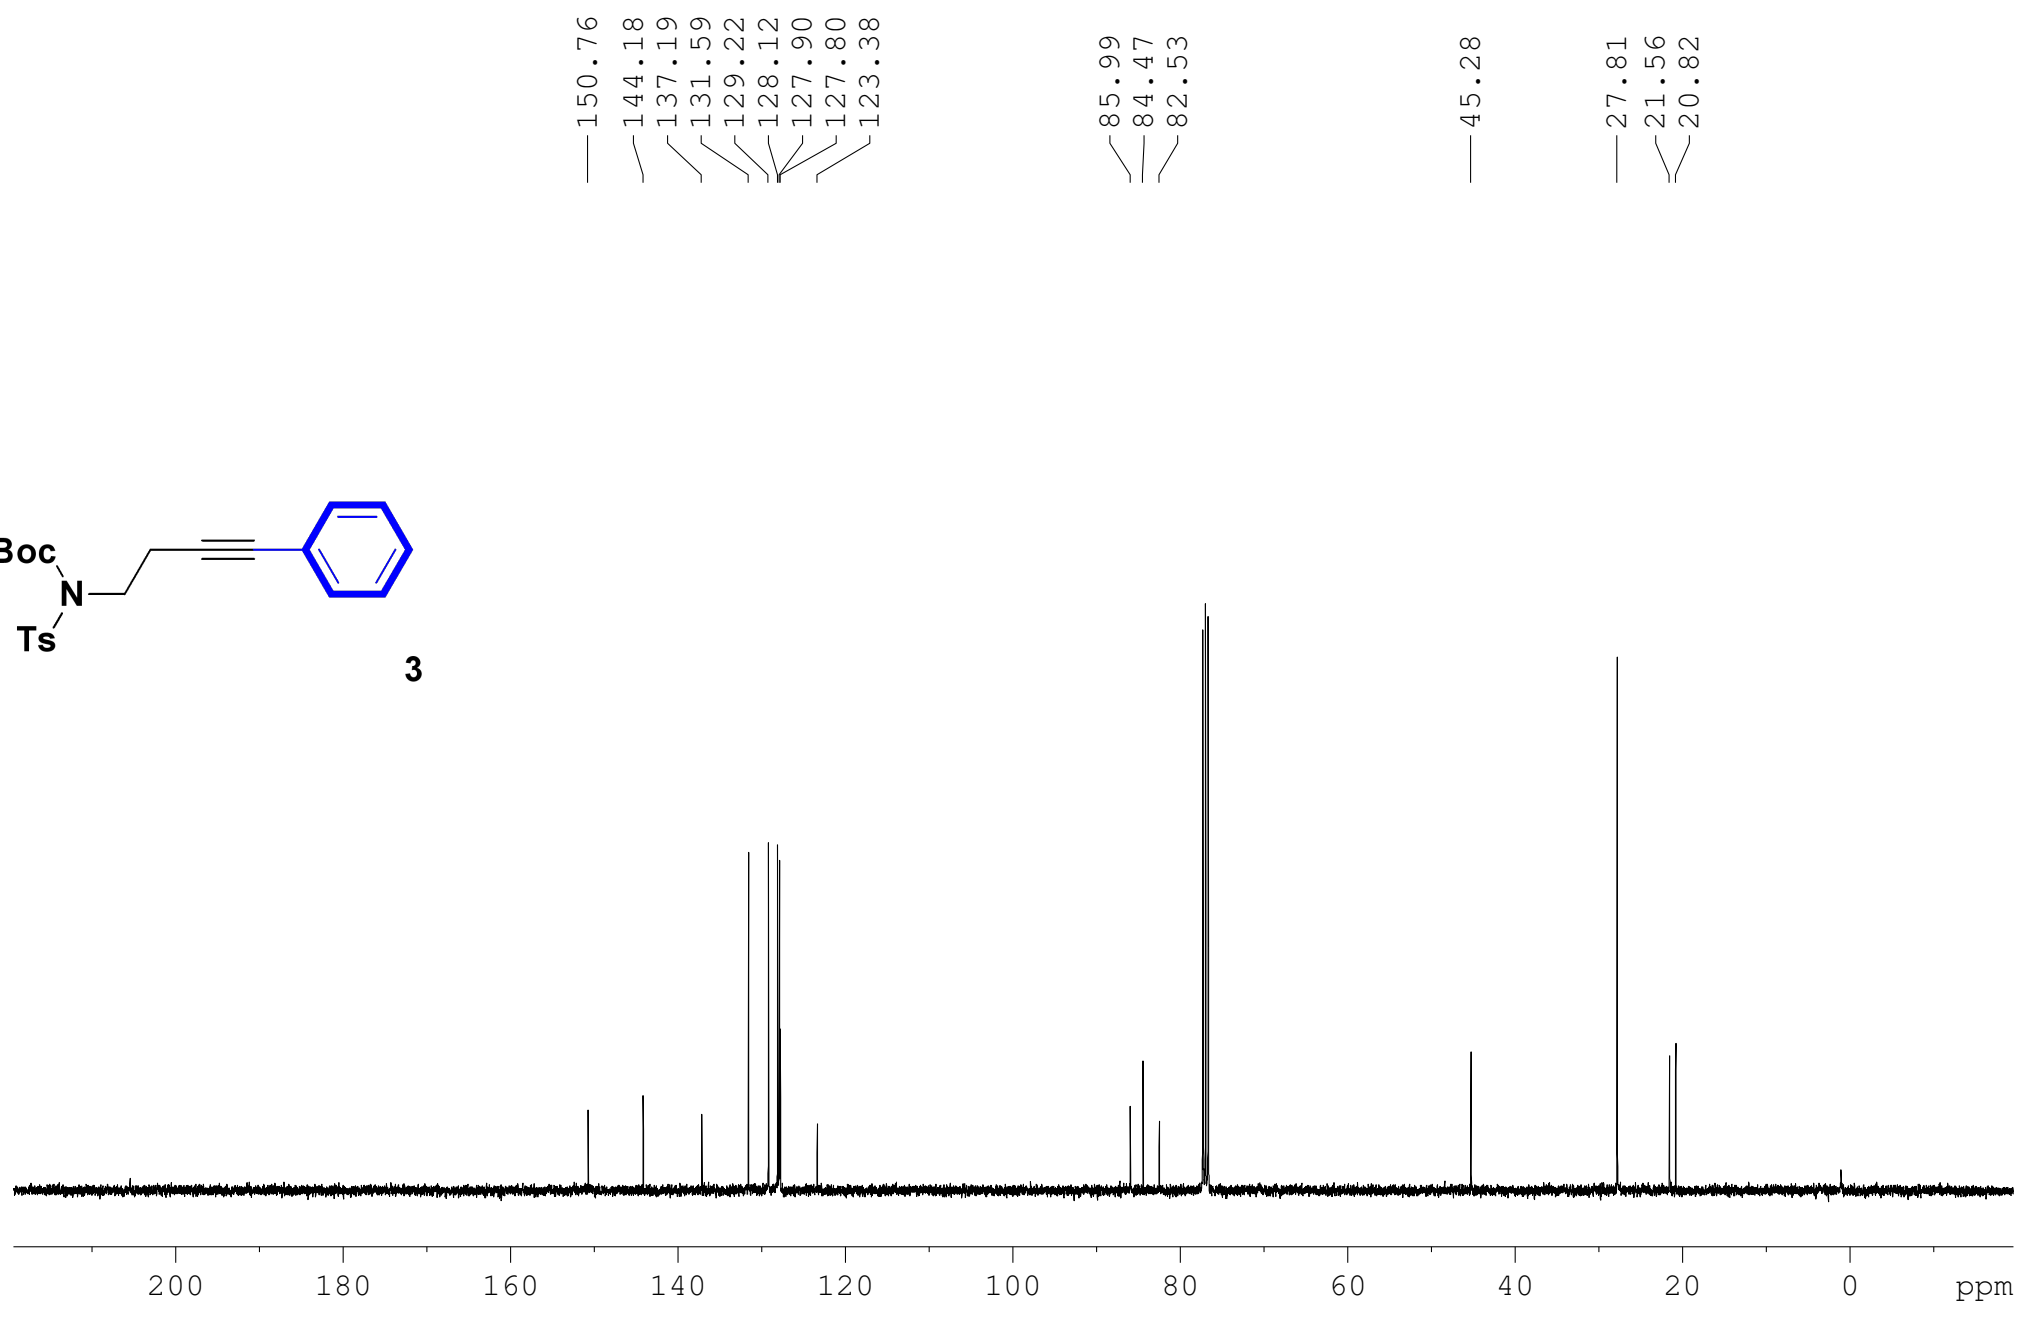

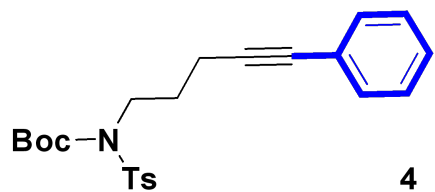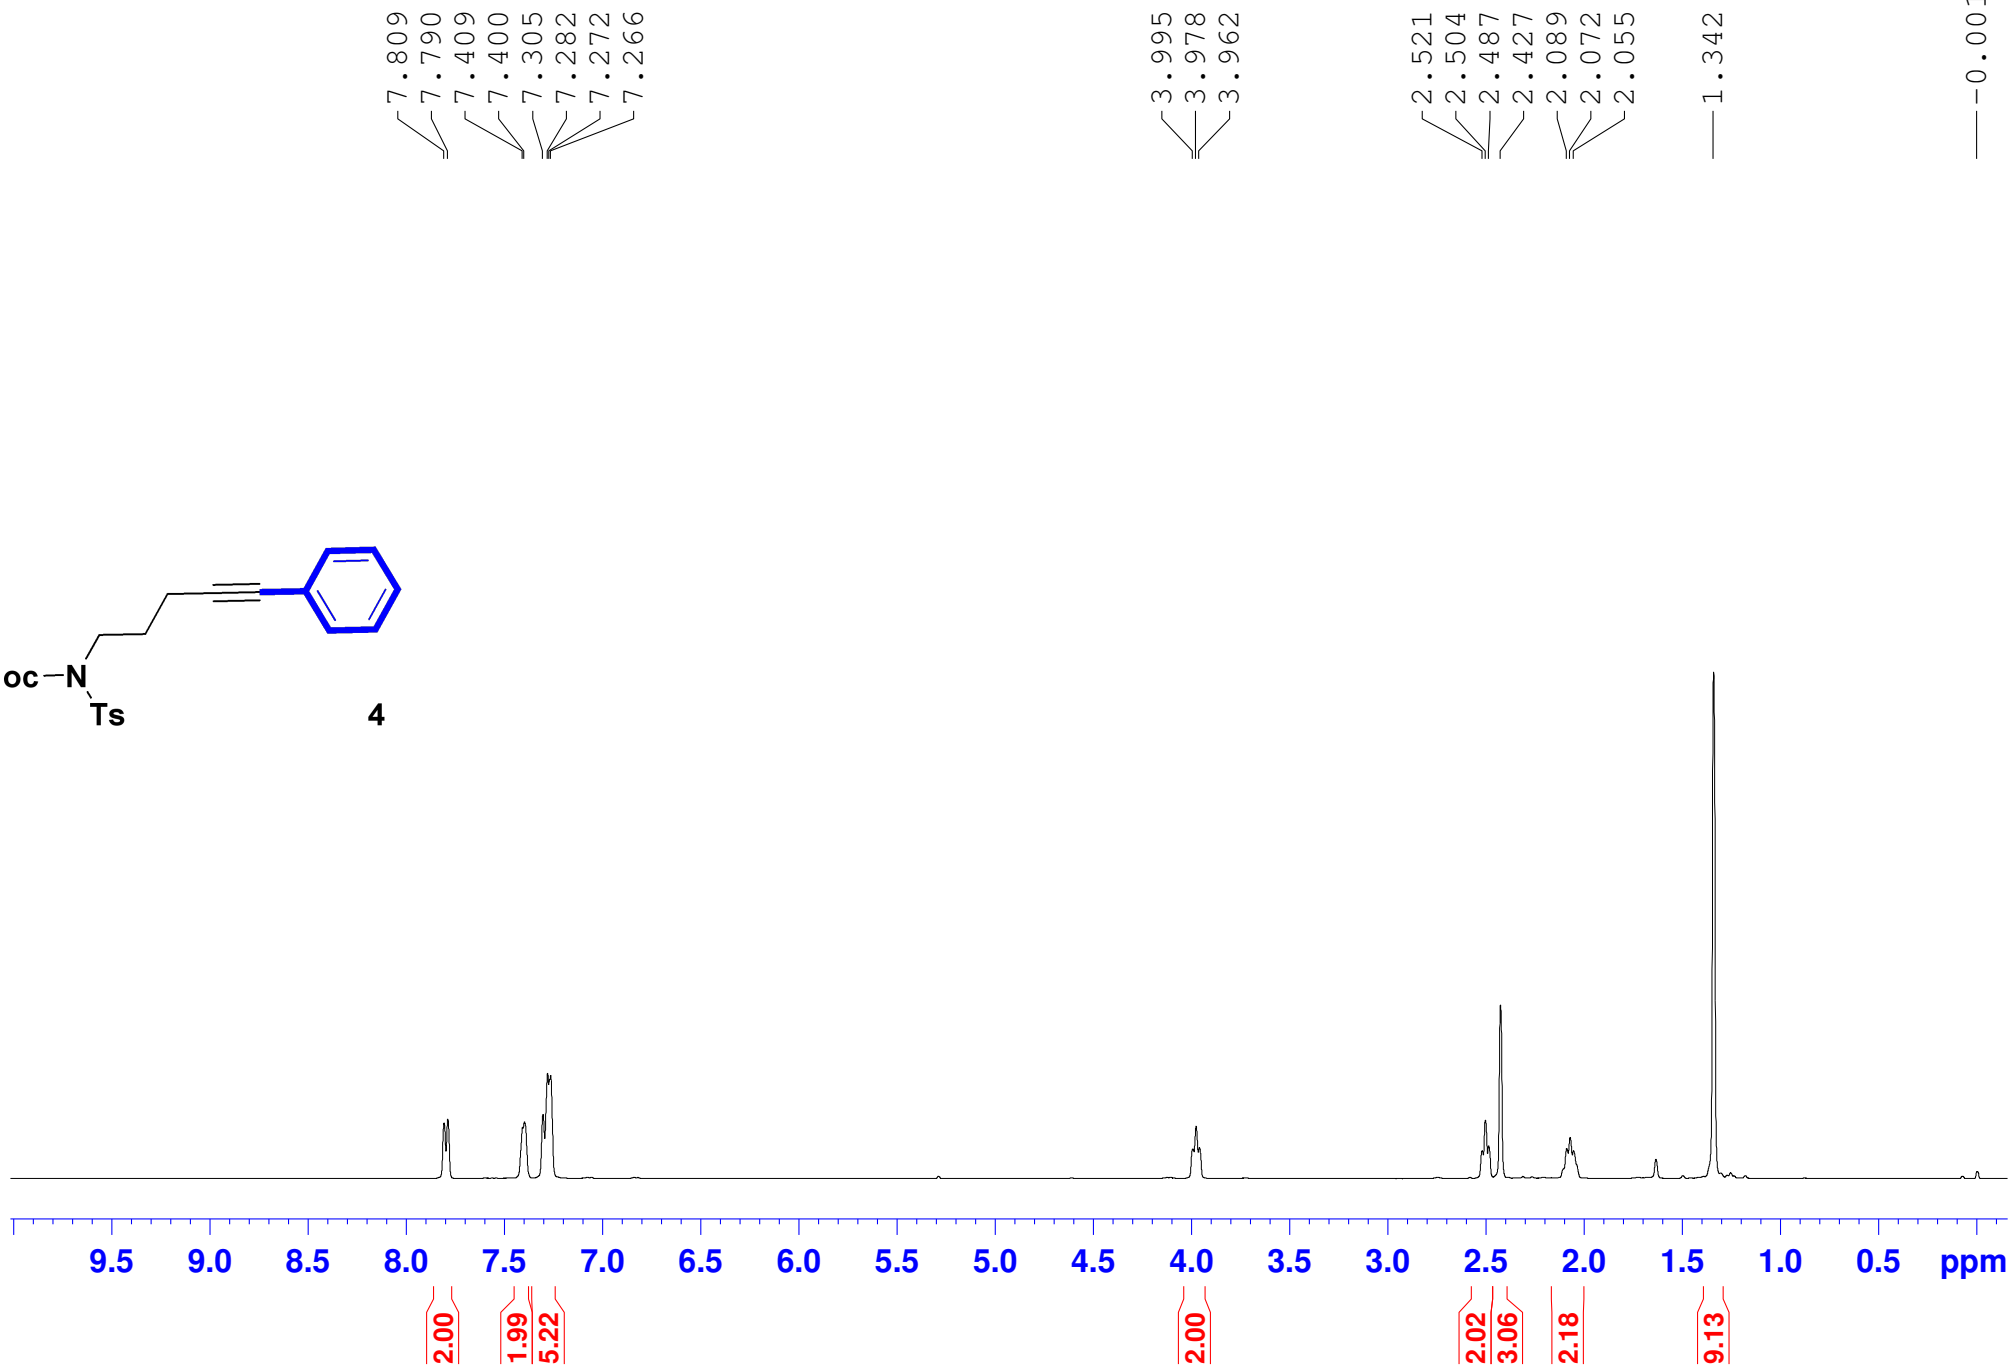

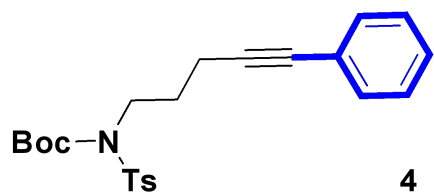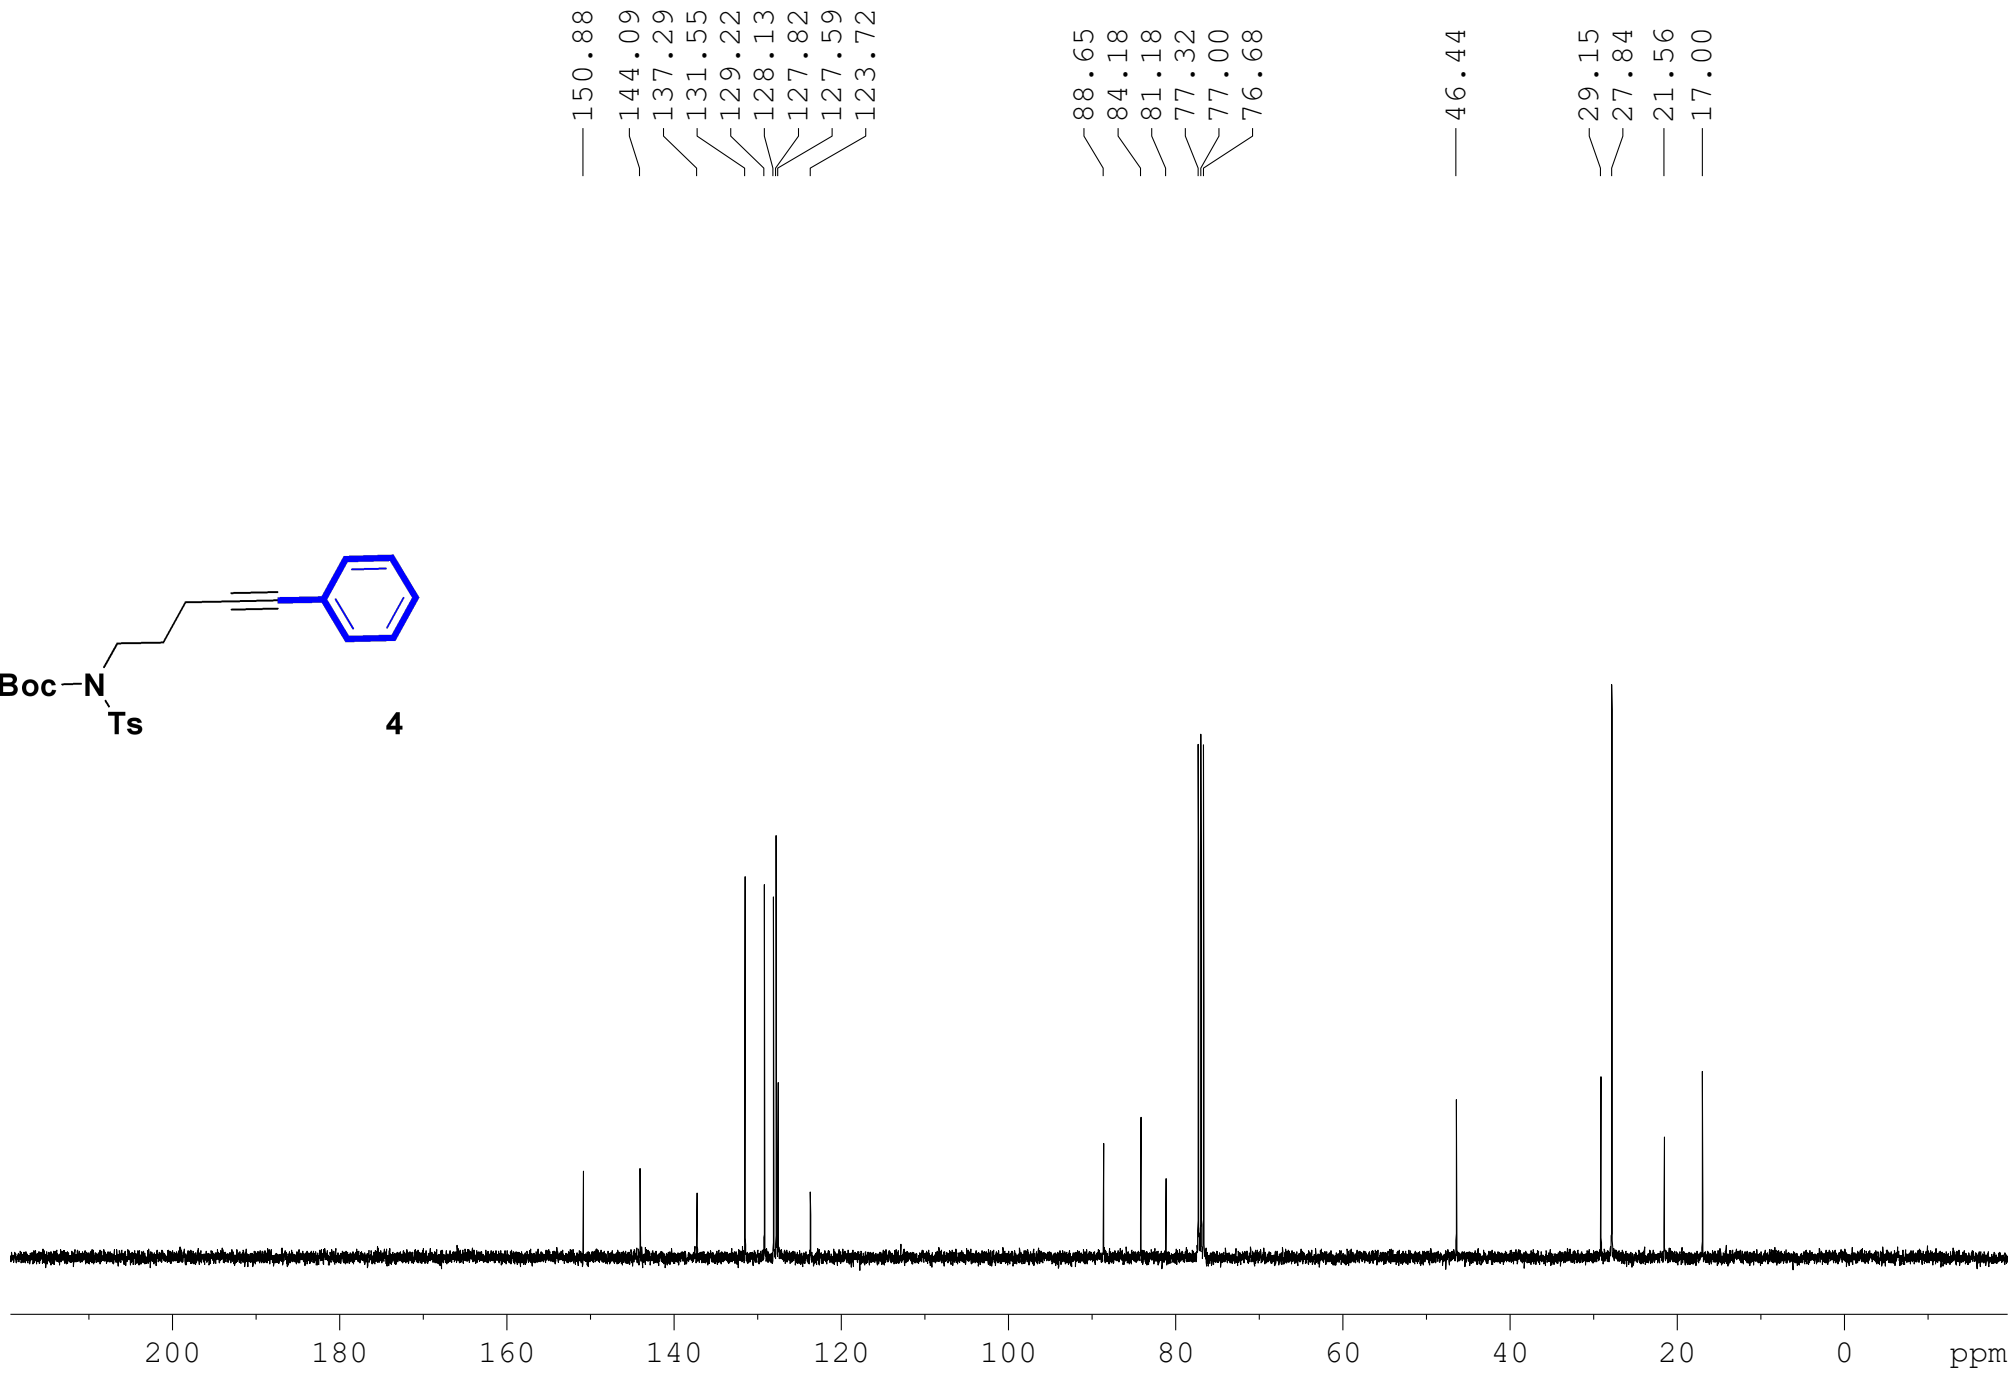

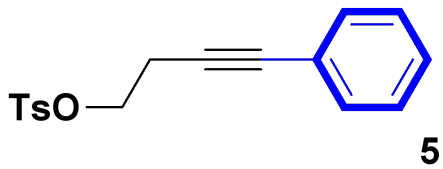

7.833  
7.814  
7.322  
7.295  
7.264

4.202  
4.185  
4.168

2.799  
2.782  
2.765  
2.421

1.593

0.000

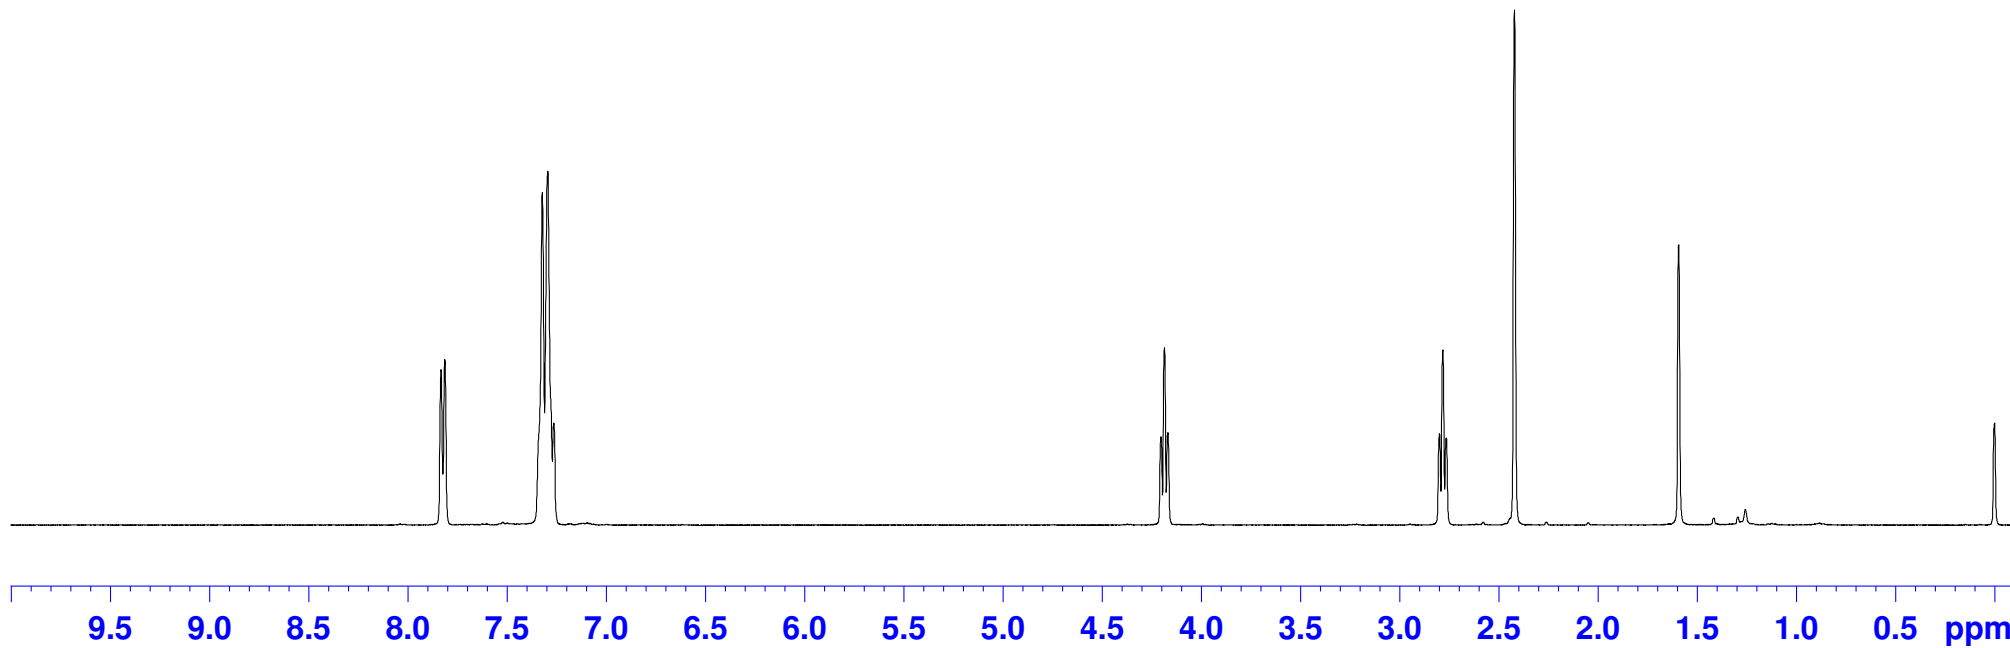

1.92

7.30

1.99

1.99

3.00

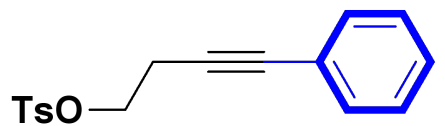

5

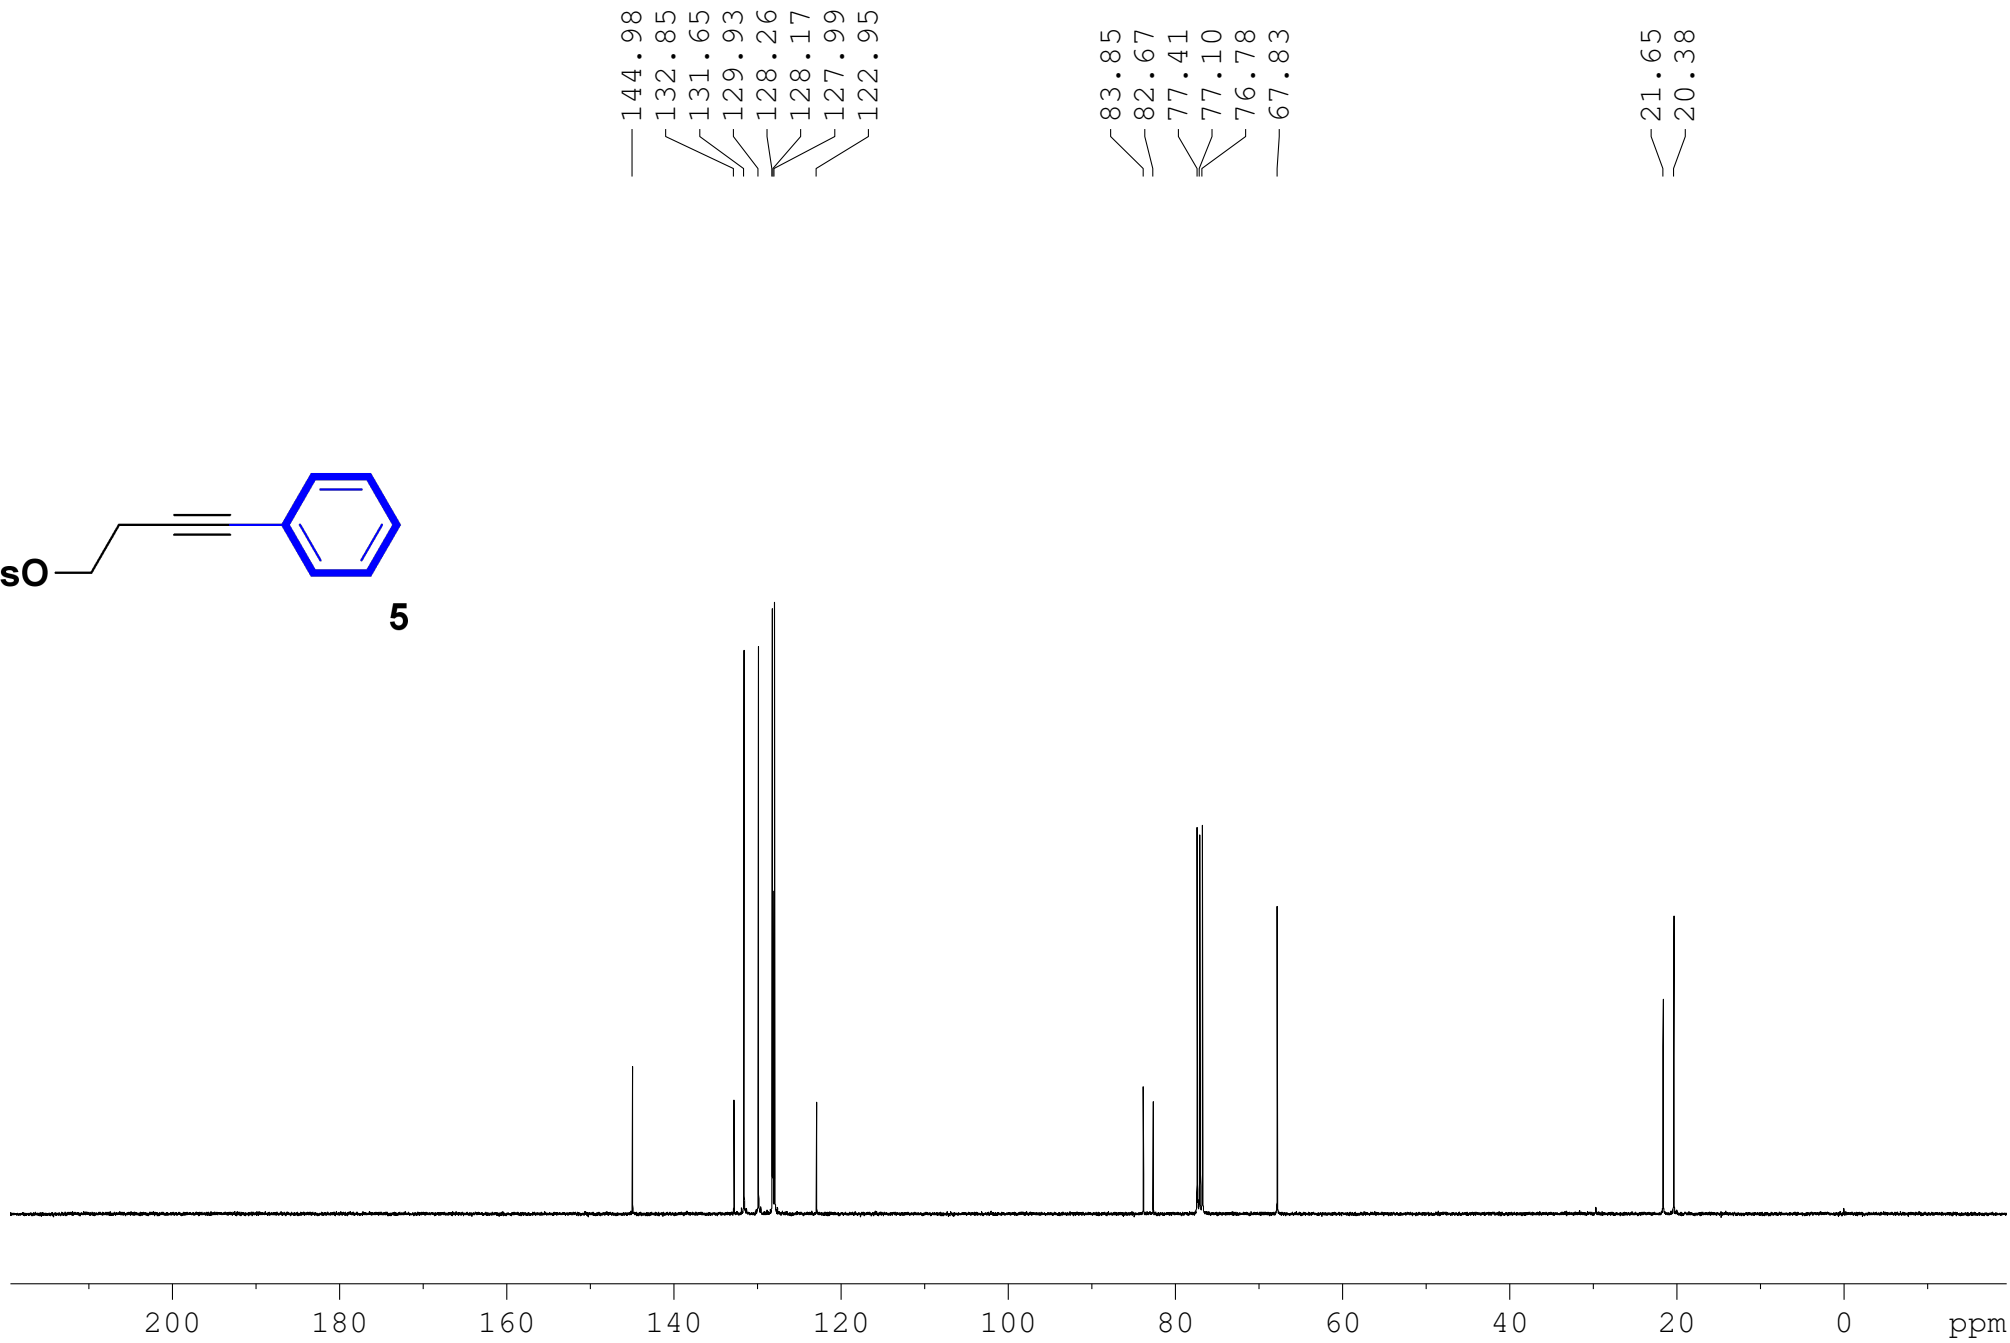

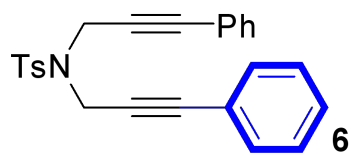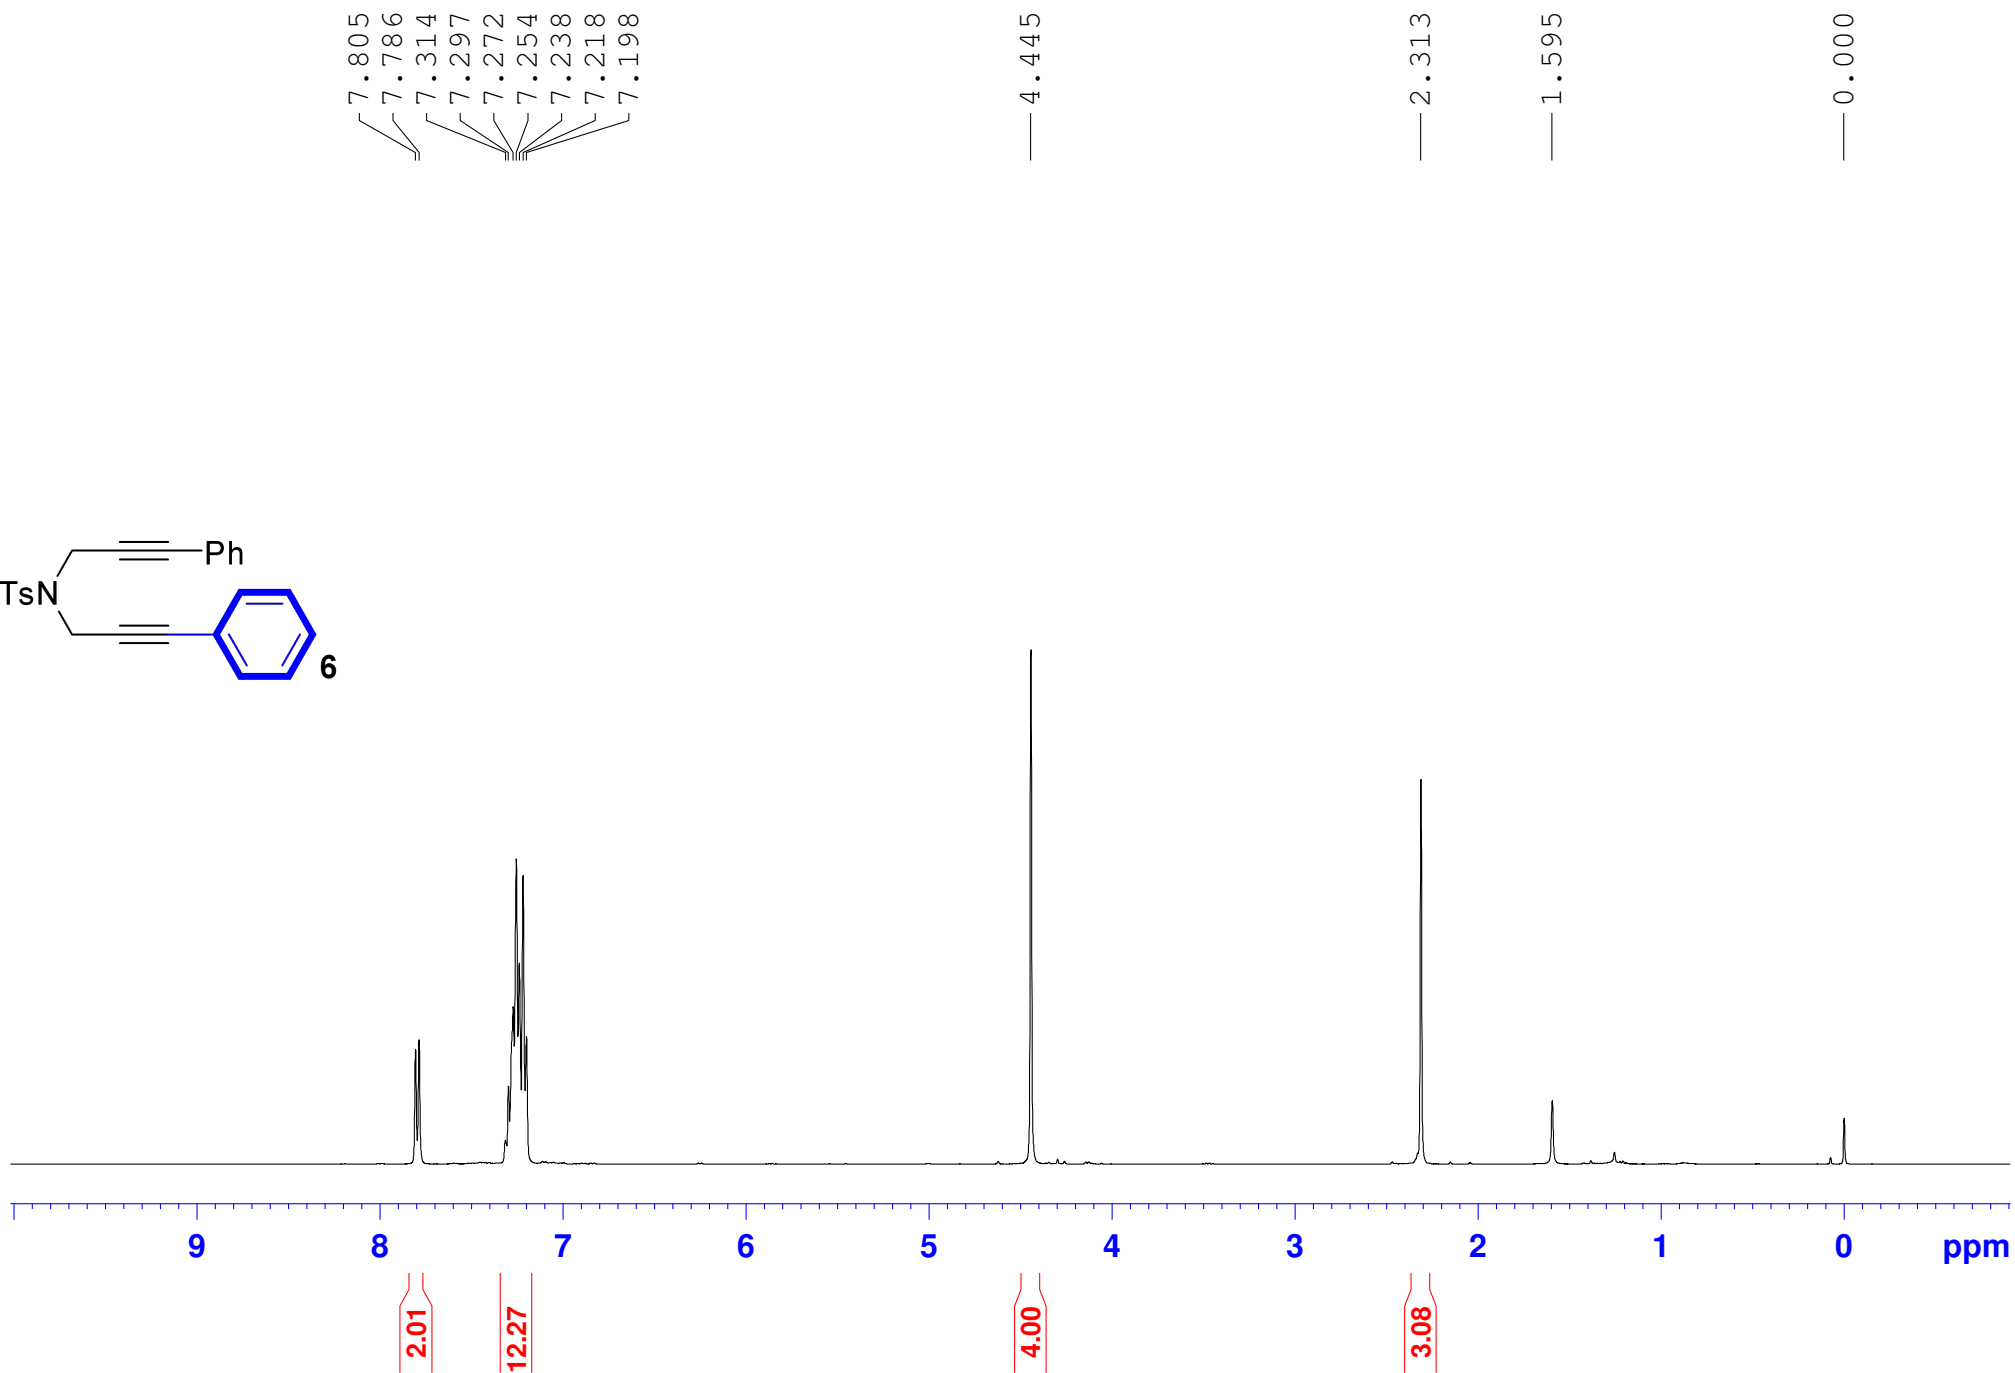

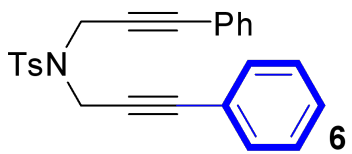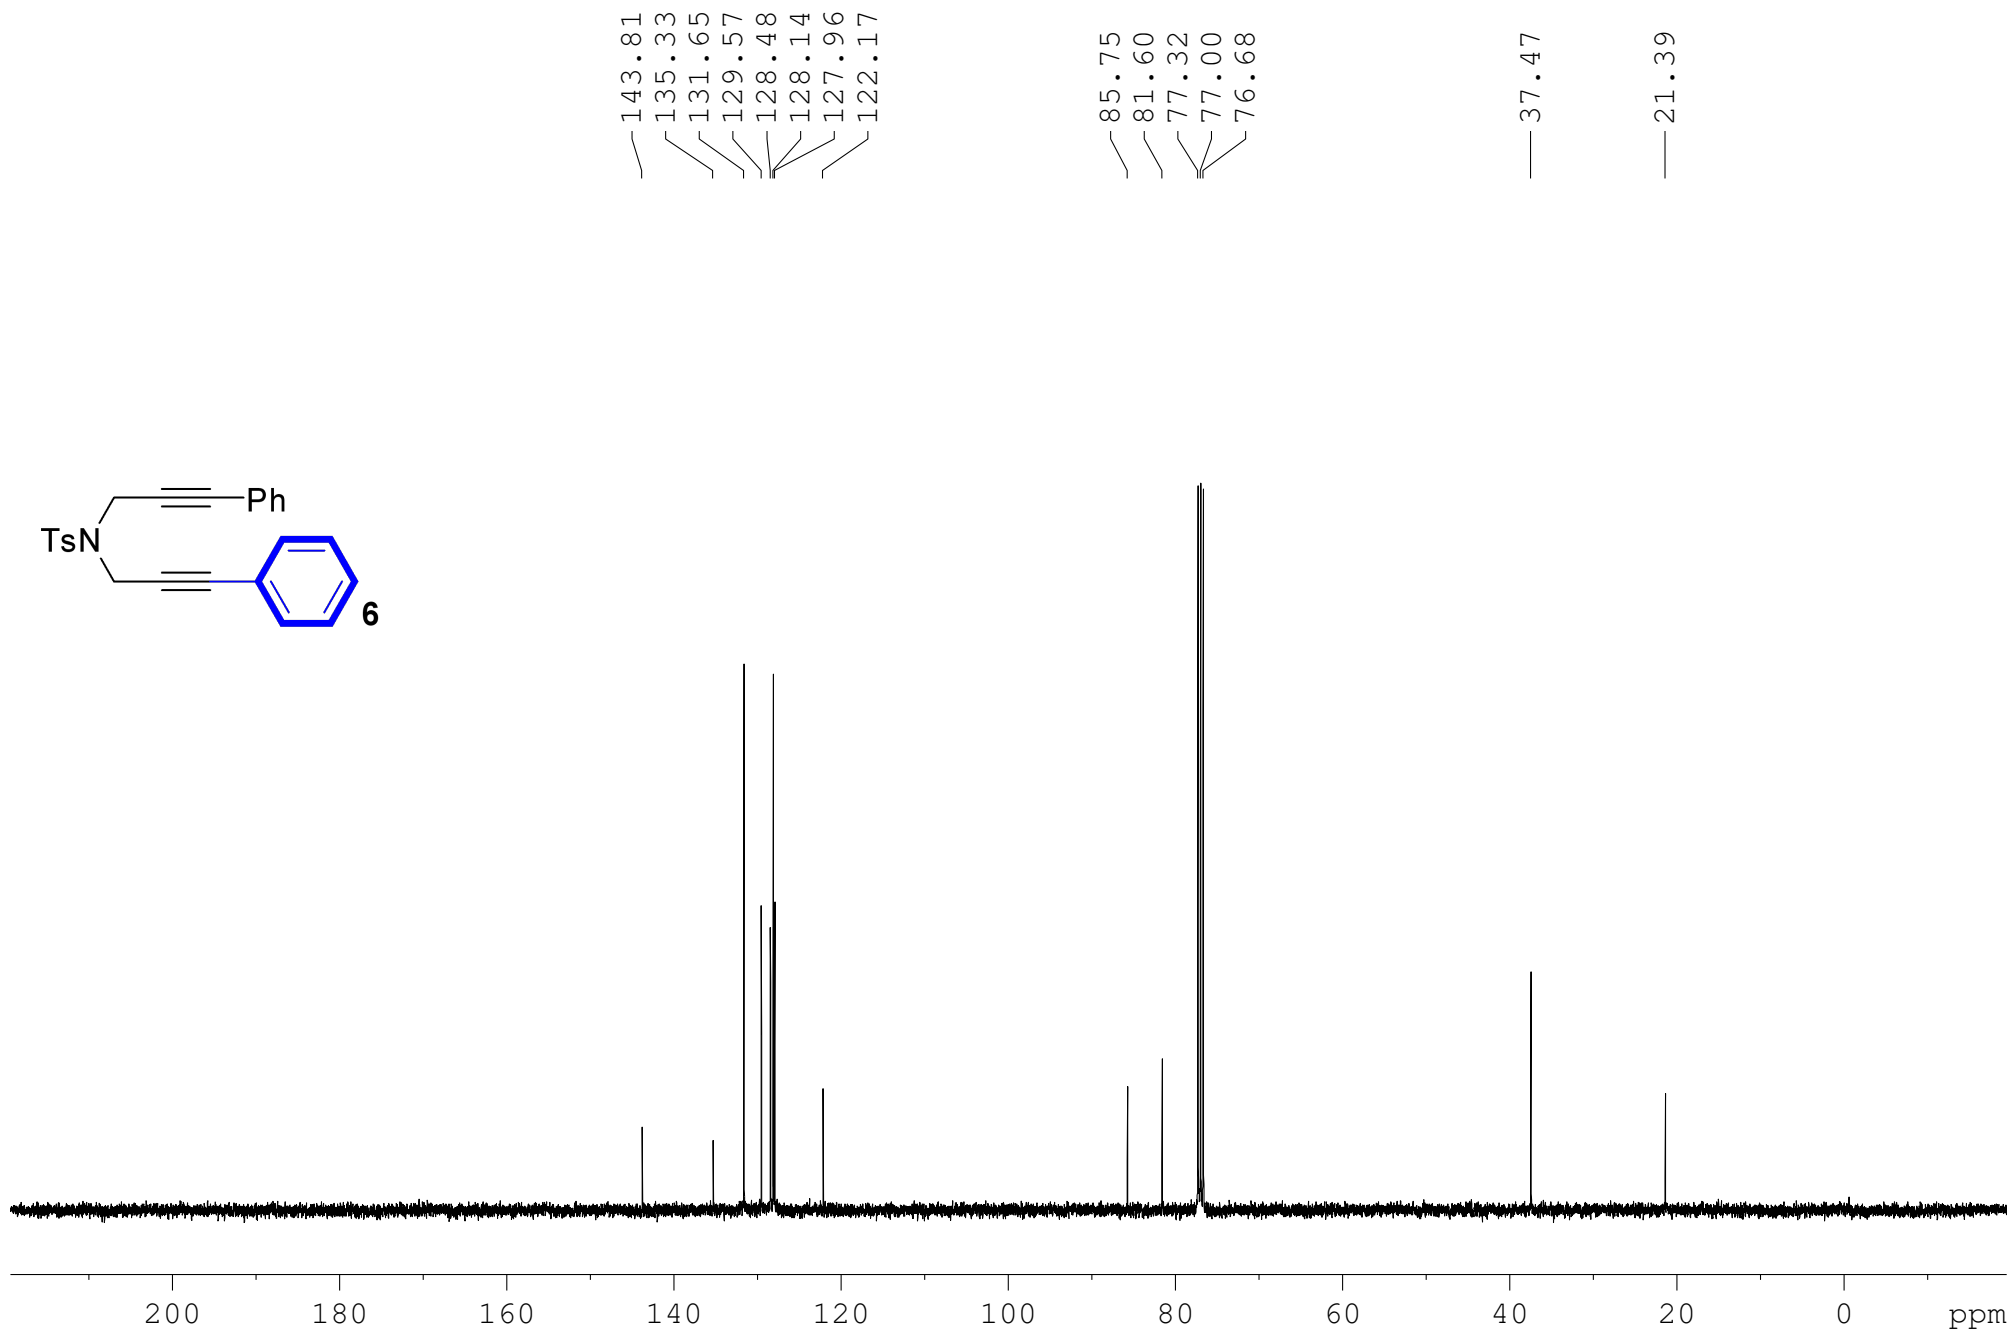



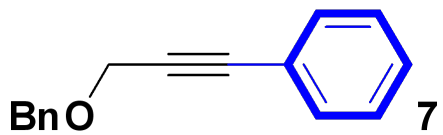

7.476  
7.469  
7.461  
7.414  
7.394  
7.371  
7.353  
7.332  
7.260

— 4.685  
— 4.410

— 1.584

— 0.004

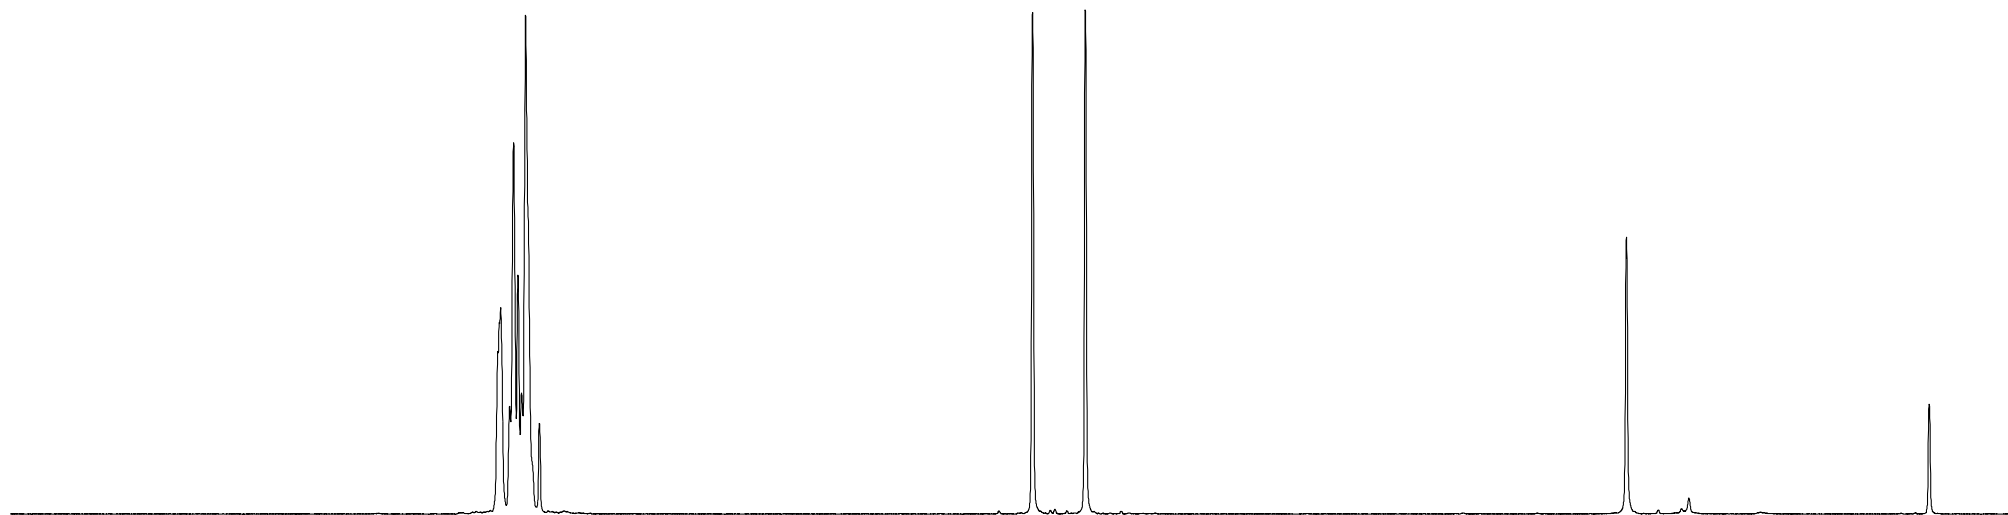

9.5 9.0 8.5 8.0 7.5 7.0 6.5 6.0 5.5 5.0 4.5 4.0 3.5 3.0 2.5 2.0 1.5 1.0 0.5 ppm

1.96  
7.92

2.00  
2.00

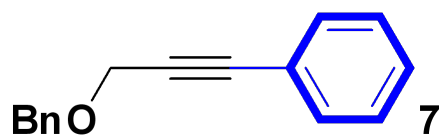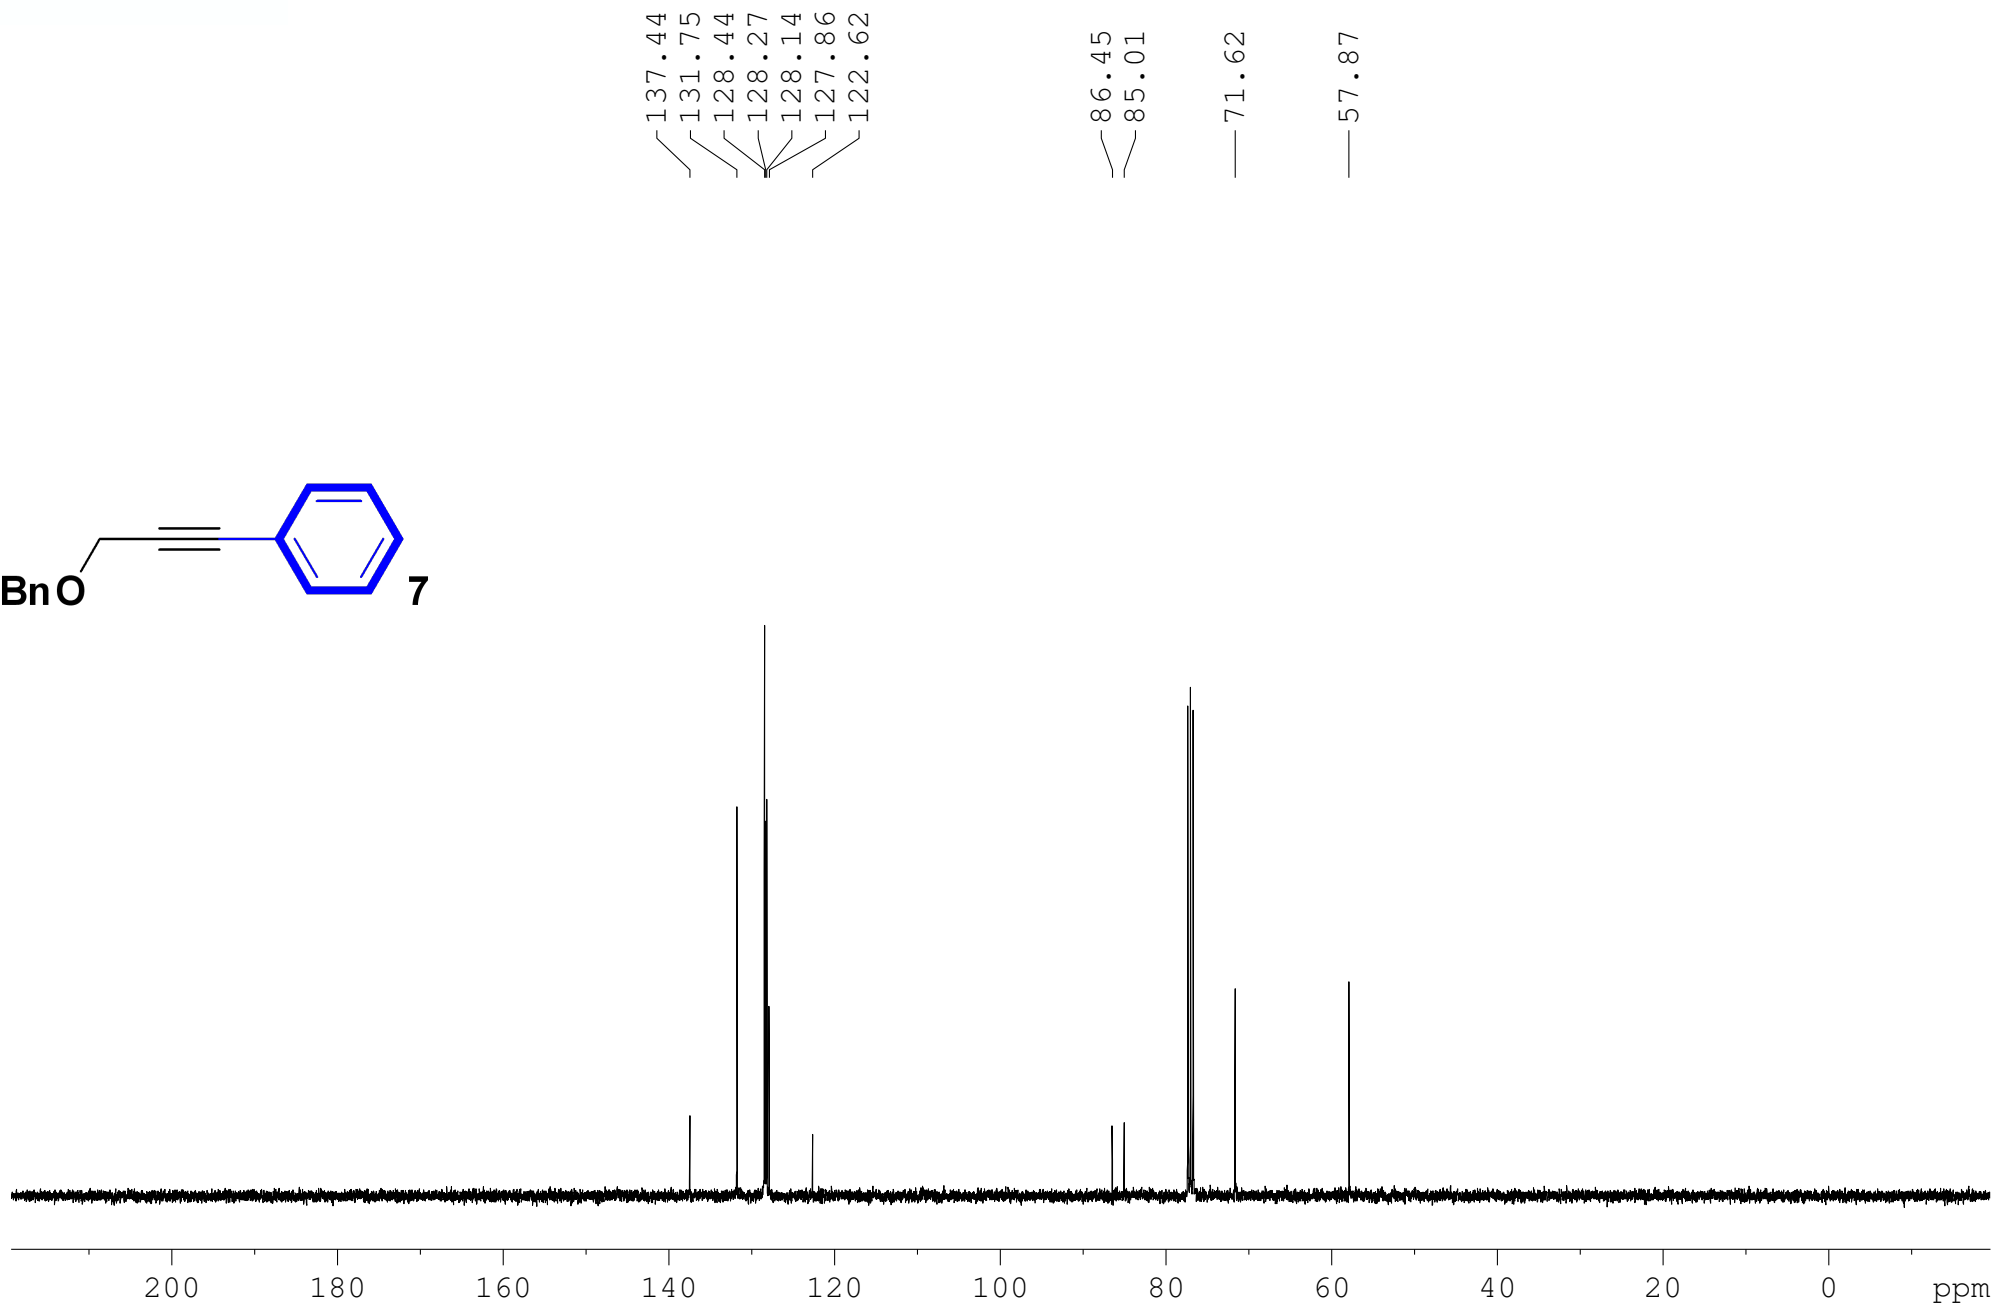

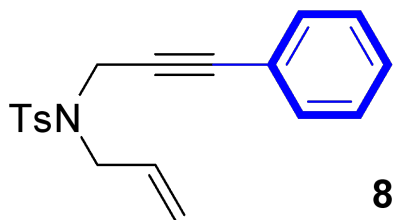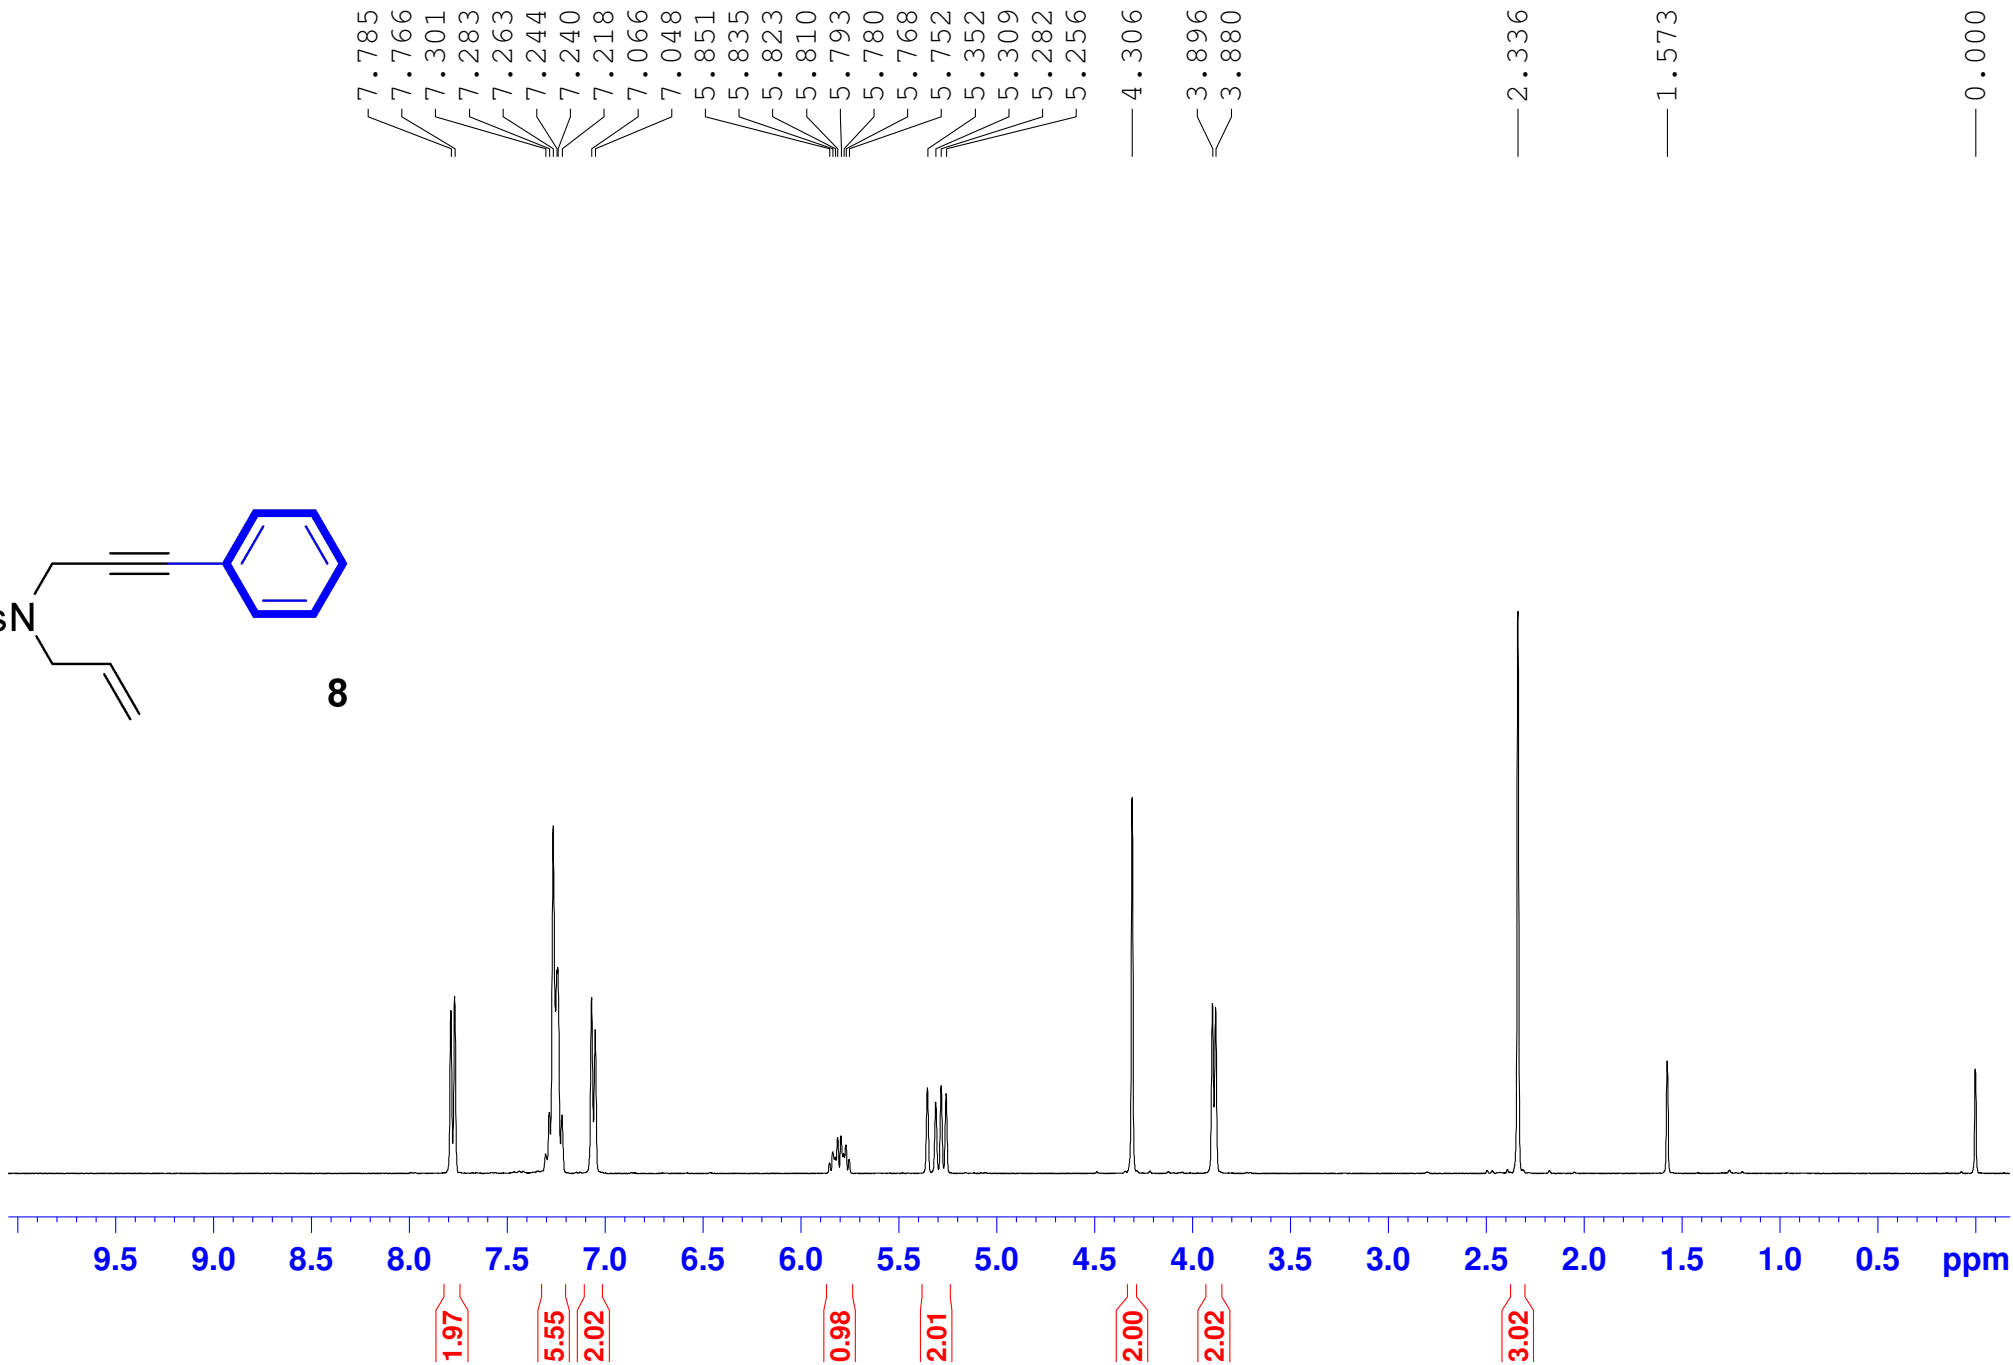

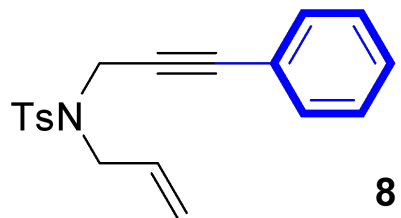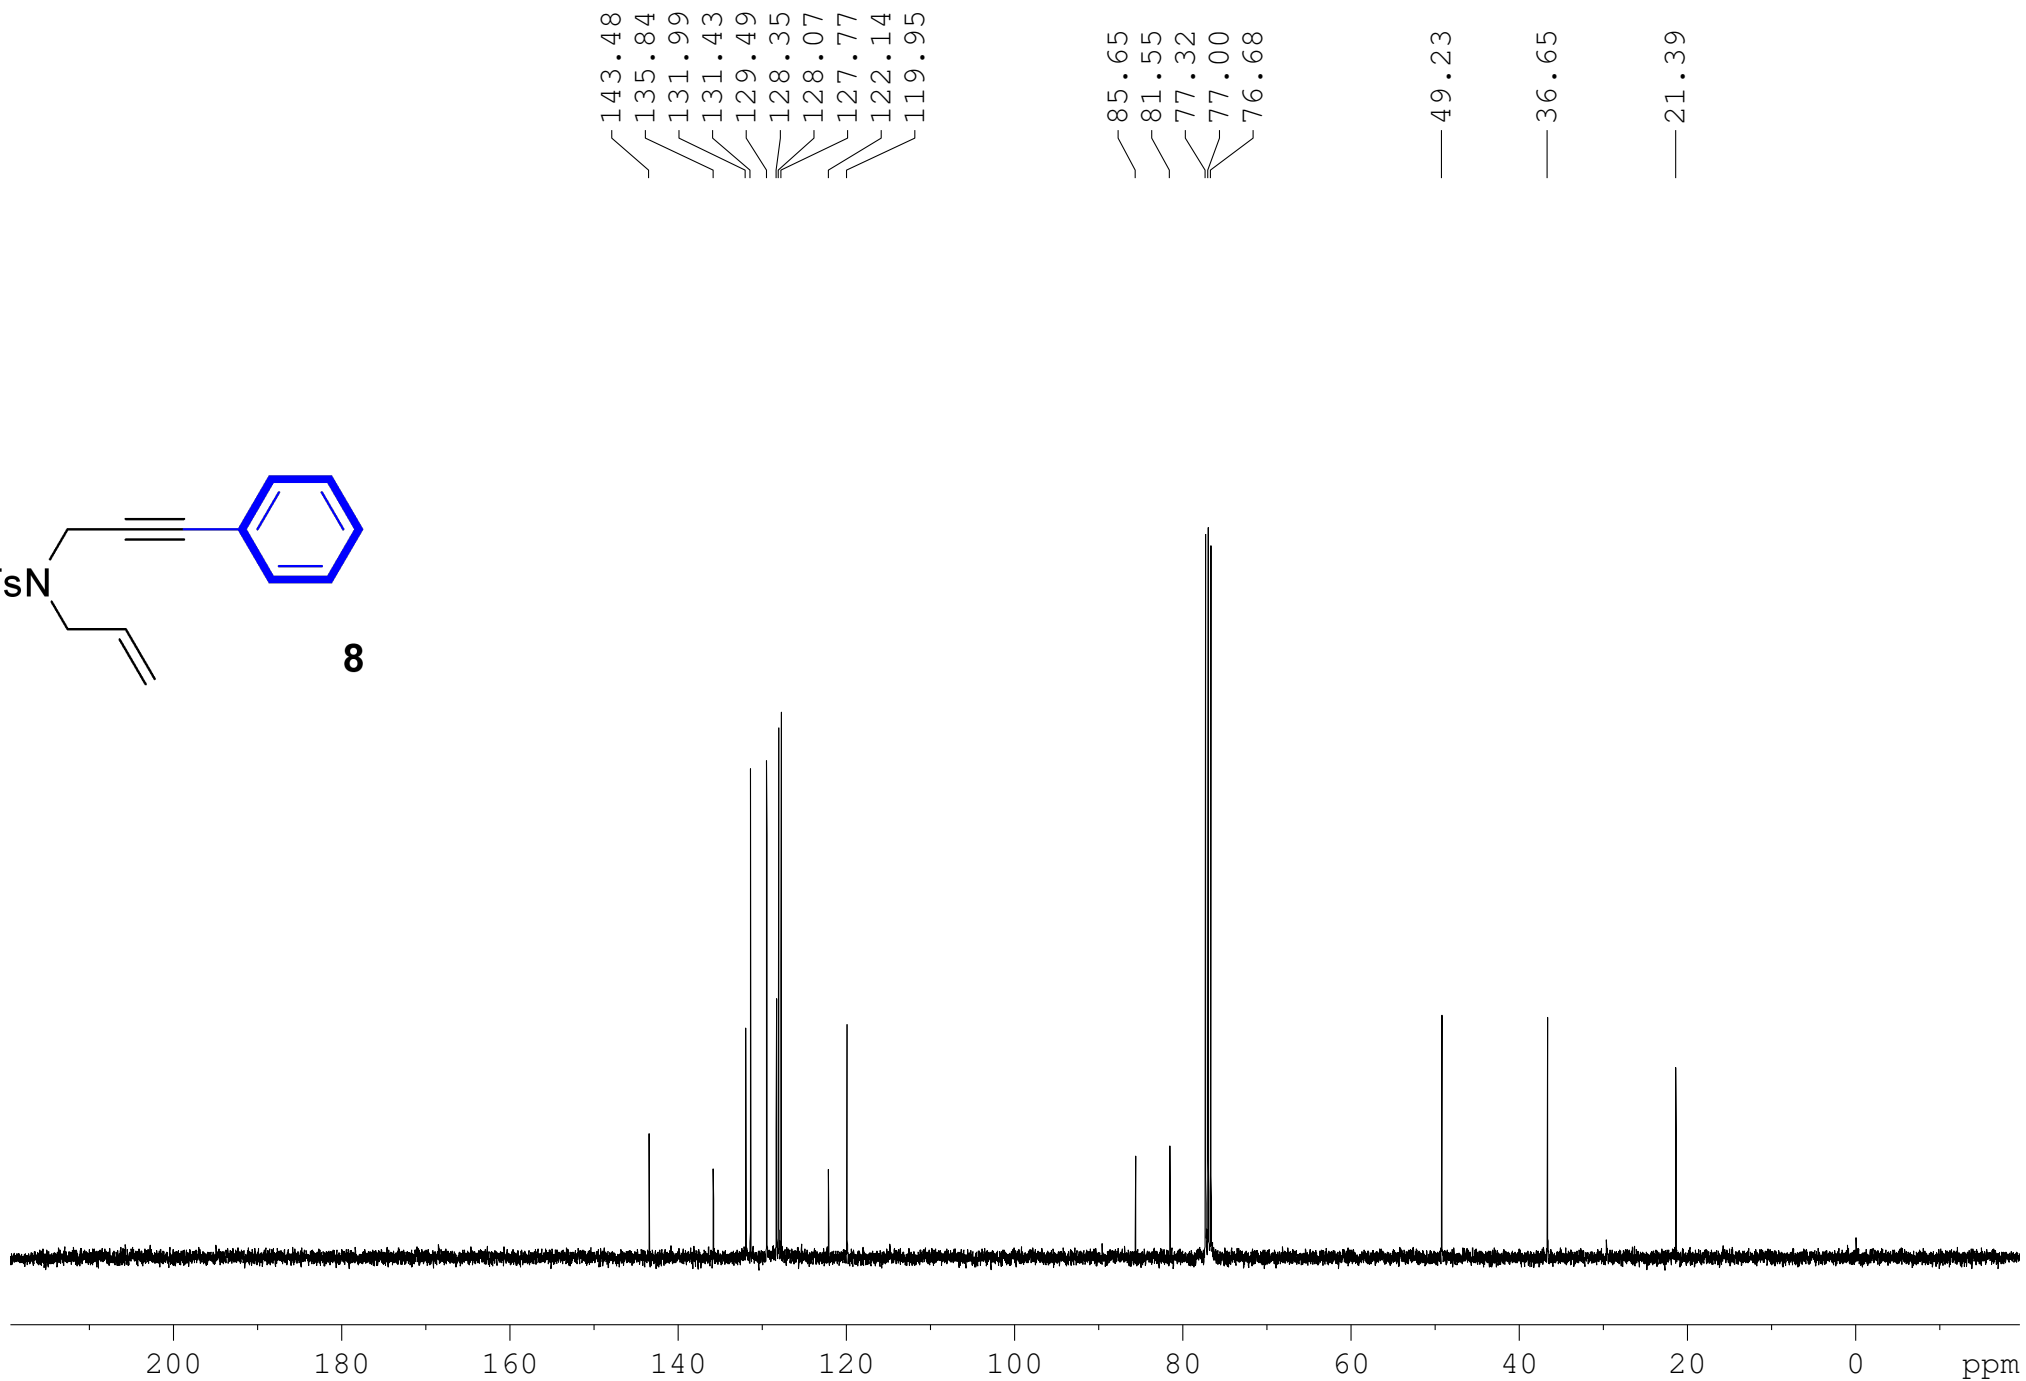

Supplement: Beilstein_J_Org_Chem-07-808-s001.pdf [file Beilstein_J_Org_Chem-07-808-s001.pdf]
